# Supplementary material for: Molecular Targets for Biological Therapies of Severe Asthma: Focus on Benralizumab and Tezepelumab
Source: MDPI journal article supplement (doi:10.3390/life11080744), 2021-07-26
Supplement: s1 [file s1]

## Supplementary data

**Table S1. Search strategy in PICOS.**

|                     |                                                                         |
|---------------------|-------------------------------------------------------------------------|
| <b>Population</b>   | Severe Asthma                                                           |
| <b>Intervention</b> | Tezepelumab of Benralizumab                                             |
| <b>Comparator</b>   | not specific                                                            |
| <b>Outcome</b>      | symptom control, emergency department visits, lung function, and safety |
| <b>Study design</b> | Randomized clinical trials, observational studies                       |

**Table S2. Search strategy in PubMed (search date: 2021. 4. 19)**

| <b>No.</b>                                                                                                                                                                                                                                                                           | <b>Query</b>                                                                                                           | <b>Results</b> |
|--------------------------------------------------------------------------------------------------------------------------------------------------------------------------------------------------------------------------------------------------------------------------------------|------------------------------------------------------------------------------------------------------------------------|----------------|
| 1                                                                                                                                                                                                                                                                                    | Asthma                                                                                                                 | 196,957        |
| 2                                                                                                                                                                                                                                                                                    | Tezepelumab                                                                                                            | 48             |
| 3                                                                                                                                                                                                                                                                                    | #1 AND #2                                                                                                              | 5              |
| 4                                                                                                                                                                                                                                                                                    | Benralizumab                                                                                                           | 411            |
| 5                                                                                                                                                                                                                                                                                    | #1 AND #4                                                                                                              | 27             |
|                                                                                                                                                                                                                                                                                      | A total of 382 publications were identified from PubMed, while using the filters in study design*, 32 studies remains. | <b>32</b>      |
| *Study type filter: Clinical Study, Clinical Trial, Clinical Trial, Phase I, Clinical Trial, Phase II, Clinical Trial, Phase III, Clinical Trial, Phase IV, Controlled Clinical Trial, Multicenter Study, Observational Study, Pragmatic Clinical Trial, Randomized Controlled Trial |                                                                                                                        |                |

Table S3. Overview of Studies

| List                         | Study name                   | Dates of study       | Study phase | Study location or region                                                                                                                                                                                                 | Interventions | Treatment arms                                                                                                       | No. of patients randomised/enrolled | Outcome assessment (weeks)      |
|------------------------------|------------------------------|----------------------|-------------|--------------------------------------------------------------------------------------------------------------------------------------------------------------------------------------------------------------------------|---------------|----------------------------------------------------------------------------------------------------------------------|-------------------------------------|---------------------------------|
| Randomized controlled trials |                              |                      |             |                                                                                                                                                                                                                          |               |                                                                                                                      |                                     |                                 |
| 1                            | Menzies-Gow et al. NAVIGATOR | Nov. 2017-Sep 2020   | Phase 3     | Asia pacific, central and eastern Europe, western Europe, Australia, North America, South America                                                                                                                        | Tezepelumab   | Placebo<br>Tezepelumab                                                                                               | 1061                                | 52                              |
| 2                            | Harrison et al. 2021 ANDHI   | July 2017 - Sep 2019 | Phase 3b    | Austria, Belgium, Canada, Denmark, Finland, France, Germany, Italy, the Netherlands, Norway, Spain, Sweden, the UK, the USA                                                                                              | Benralizumab  | Placebo<br>Benralizumab 30mg q8w                                                                                     | 656                                 | 24                              |
| 3                            | Emson et al. 2020 CASCADE    | Sep 2018–Dec 2020    | Phase 2b    | Bulgaria, Czech Republic, Hungary, Israel, Japan, Latvia, Lithuania, Serbia, Slovakia, South Africa, Ukraine                                                                                                             | Tezepelumab   | Low-dose Tezepelumab 70mg q4w<br>Medium-dose Tezepelumab 210mg q4w<br>High-dose Tezepelumab 280mg q2w<br>Placebo q2w | NA                                  | 28                              |
| 4                            | Busee et al. 2018 BORA       | Nov 2014–July 2016   | Phase 3     | Argentina, Australia, Brazil, Bulgaria, Canada, Chile, Czech Republic, France, Germany, Japan, Peru, Philippines, Poland, Romania, Russia, South Africa, South Korea, Spain, Sweden Turkey, Ukarine, the UK, US, Vietnam | Benralizumab  | Benralizumab 30mg q4w<br>Benralizumab 30mg q8w                                                                       | 1926                                | 56 (adults)<br>108 (adolescent) |
| 5                            |                              | NA                   | Phase 2     | Bulgaria, Czech Republic, Hungary,                                                                                                                                                                                       | Tezepelumab   | Low-dose Tezepelumab 70mg q4w                                                                                        | 550                                 | 52                              |

| List | Study name                       | Dates of study        | Study phase | Study location or region                                                                       | Interventions | Treatment arms                                                                                                                                                                                      | No. of patients randomised/enrolled | Outcome assessment (weeks) |
|------|----------------------------------|-----------------------|-------------|------------------------------------------------------------------------------------------------|---------------|-----------------------------------------------------------------------------------------------------------------------------------------------------------------------------------------------------|-------------------------------------|----------------------------|
|      | Corren et al. 2017<br>PATHWAY    |                       |             | Israel, Japan, Latvia, Lithuania, Serbia, Slovakia, South Africa, Ukraine                      |               | Medium-dose Tezepelumab 210mg q4w<br>High-dose Tezepelumab 280mg q2w<br>Placebo q2w<br>Benralizumab                                                                                                 |                                     |                            |
| 6    | Nair et al. 2017<br>ZONDA        | April 2014–Nov 2015   | Phase 2a    | Argentina, Bulgaria, Canada, Chile, France, Germany, Korea, Poland, Spain, Turkey, Ukraine, US | Benralizumab  | Placebo<br>Benralizumab 30mg q4w<br>Benralizumab 30mg q8w                                                                                                                                           | 220                                 | 28                         |
| 7    | Bleecker et al. 2016<br>SIROCCO  | Sep 2013–Mar 2015     | Phase 3     | Africa, Asia, Europe, North America, and South America                                         | Benralizumab  | Placebo<br>Benralizumab 30mg q4w<br>Benralizumab 30mg q8w                                                                                                                                           | 1205                                | 48                         |
| 8    | FitzGerald et al. 2016<br>CALIMA | August 2013–Mar 2015  | Phase 3     | Africa, Asia, Europe, North America, and South America                                         | Benralizumab  | Placebo<br>Benralizumab 30mg q4w<br>Benralizumab 30mg q8w                                                                                                                                           | 1306                                | 56                         |
| 9    | Park et al. 2016                 | August 2011–July 2013 | Phase 2a    | South Korea, Japan                                                                             | Benralizumab  | Placebo<br>Benralizumab 2mg<br>Benralizumab 20mg<br>Benralizumab 100mg                                                                                                                              | 106                                 | 52                         |
| 10   | Castro et al. 2014               | Jan 2011–Mar 2012     | phase 2b    | USA, Canada, Bulgaria, Brazil, Peru, Mexico, Poland, Russia, Argentina, and Colombia           | Benralizumab  | Eosinophilic- Placebo<br>Eosinophilic- Benralizumab 2mg<br>Eosinophilic- Benralizumab 20mg<br>Eosinophilic- Benralizumab 100mg<br>Non-Eosinophilic- Placebo<br>Non-Eosinophilic- Benralizumab 100mg | 324                                 | 52                         |
| 11   | Nowak et al. 2015                | Feb 2009–Mar 2011     | Phase 2     | United States, Canada                                                                          | Benralizumab  | Placebo<br>Benralizumab 0.3mg/kg<br>Benralizumab 1.0mg/kg                                                                                                                                           | 110                                 | 24 (168 days)              |
| 12   | Laviolette et al. 2013           | April 2008–           | Phase 1     | United States, Canada                                                                          | Benralizumab  | Placebo<br>Benralizumab 100mg                                                                                                                                                                       | 27                                  | 20                         |

| List                       | Study name               | Dates of study      | Study phase               | Study location or region | Interventions                                               | Treatment arms                                                                                                                                                                                                                                                         | No. of patients randomised/enrolled | Outcome assessment (weeks) |
|----------------------------|--------------------------|---------------------|---------------------------|--------------------------|-------------------------------------------------------------|------------------------------------------------------------------------------------------------------------------------------------------------------------------------------------------------------------------------------------------------------------------------|-------------------------------------|----------------------------|
|                            |                          | April 2011          |                           |                          |                                                             | Benralizumab 200mg                                                                                                                                                                                                                                                     |                                     | (140 days)                 |
| <b>Observational study</b> |                          |                     |                           |                          |                                                             |                                                                                                                                                                                                                                                                        |                                     |                            |
| 13                         | Jackson et al. 2021      | 2016 Nov-2020 Feb   | UK Severe Asthma Registry | UK                       |                                                             | To describe the demographic and clinical characteristics of severe asthma patients in UKSAR, to describe current biologic selection in eligible patients and to examine the difference between patients who are T2 biomarker-high and T2 biomarker-low at registration | 2225                                |                            |
| 14                         | Padilla-Galo et al. 2020 | 2019 Jan-2019 Nov.  | Cross-sectional           | Spain                    | Benralizumab                                                | To evaluate the efficacy and safety of benralizumab for the treatment of severe refractory eosinophilic asthma in a real-world cohort of patients                                                                                                                      | 42                                  | 168                        |
|                            |                          |                     | multicenter               |                          |                                                             |                                                                                                                                                                                                                                                                        |                                     |                            |
| 15                         | Pelaia et al. 2020       |                     | real-life                 | Italy                    | Benralizumab                                                | The effects of benralizumab on asthma exacerbations and lung hyperinflation                                                                                                                                                                                            | 22                                  | 24                         |
|                            |                          |                     | single center             |                          |                                                             |                                                                                                                                                                                                                                                                        |                                     |                            |
| 16                         | Menzella et al. 2019     | 2017 June-2019 June | Observational             | Italy                    | Omalizumab, Mepolizumab Benralizumab, Bronchial themoplasty | Provide a real-life description of SRA population by describing a cohort of patients affected by refractory asthma referring to Pneumology Unit of Italy                                                                                                               | 137                                 |                            |
|                            |                          |                     | Cross-sectional           |                          |                                                             |                                                                                                                                                                                                                                                                        |                                     |                            |

Table S4. Overview of post analysis

| List                 | Study name          | Associated references | Inclusion criteria                                                                                                                                                                                | Treatment arm                                                                                                        | Outcome assessment                                                                                                                                                                            |
|----------------------|---------------------|-----------------------|---------------------------------------------------------------------------------------------------------------------------------------------------------------------------------------------------|----------------------------------------------------------------------------------------------------------------------|-----------------------------------------------------------------------------------------------------------------------------------------------------------------------------------------------|
| <b>Post analysis</b> |                     |                       |                                                                                                                                                                                                   |                                                                                                                      |                                                                                                                                                                                               |
| 17                   | Corren et al. 2021  | PATHWAY Phase 2b      | The same as PATHWAY                                                                                                                                                                               | Low-dose Tezepelumab 70mg q4w<br>Medium-dose Tezepelumab 210mg q4w<br>High-dose Tezepelumab 280mg q2w<br>Placebo q2w | Further assessed the impact of tezepelumab on patient-reported outcomes in PATHWAY                                                                                                            |
| 18                   | Corren et al. 2020  | PATHWAY Phase 2b      | The same as PATHWAY                                                                                                                                                                               | Low-dose Tezepelumab 70mg q4w<br>Medium-dose Tezepelumab 210mg q4w<br>High-dose Tezepelumab 280mg q2w<br>Placebo q2w | evaluated tezepelumab's effect on the frequency and duration of hospitalization, ED visits, and ICU visits                                                                                    |
| 19                   | Lugogo et al. 2020  | SIROCCO CALIMA        | aged $\geq 18$ years                                                                                                                                                                              | Benralizumab 30mg q4w<br>Benralizumab 30mg q8w<br>Placebo q4w                                                        | blood eosinophil count (BECs) were measured at baseline and weeks 4, 8, 24, 40, and at end of treatment week 48 for SIROCCO, and week 56 for CALIMA                                           |
| 20                   | Jackson et al. 2020 | SIROCCO CALIMA        | The same as SIROCCO and CALIMA                                                                                                                                                                    | Benralizumab 30mg q4w<br>Benralizumab 30mg q8w<br>Placebo q4w                                                        | evaluated the predicted value of baseline blood eosinophil counts vs. serum IgE concentrations on exacerbation risk and the association of these variables with benralizumab treatment effect |
| 21                   | Chipps et al. 2020  | SIROCCO CALIMA        | Patients who were receiving high-dose ICS/LABA, representing patients receiving Global Initiative for Asthma Steps 4 and 5 treatment, and had baseline eosinophil counts of at least 300 cells/uL | Benralizumab 30mg q4w<br>Benralizumab 30mg q8w<br>Placebo q4w                                                        | Evaluated fixed airflow obstruction influence on benralizumab treatment response                                                                                                              |
| 22                   | Chia et al. 2019    | SIROCCO CALIMA        | The same as SIROCCO and CALIMA                                                                                                                                                                    | Benralizumab 30mg q4w<br>Benralizumab 30mg q8w<br>Placebo q4w                                                        | PK exposure and efficacy endpoints of AER                                                                                                                                                     |
| 23                   | Chupp et al. 2019   | SIROCCO CALIMA ZONDA  | The same as SIROCCO and CALIMA and ZONDA                                                                                                                                                          | Benralizumab 30mg q4w<br>Benralizumab 30mg q8w<br>Placebo q4w                                                        | To assess benralizumab's onset of action and efficacy by examining change in morning peak expiratory flow (PEF) after initiation of treatment in the phase 3 SIROCCO, CALIMA, and Zonda       |

| List | Study name           | Associated references                      | Inclusion criteria                                                                                                                                     | Treatment arm                                                            | Outcome assessment                                                                                                      |
|------|----------------------|--------------------------------------------|--------------------------------------------------------------------------------------------------------------------------------------------------------|--------------------------------------------------------------------------|-------------------------------------------------------------------------------------------------------------------------|
| 24   | Bleecker et al. 2018 | SIROCCO<br>CALIMA                          | High-dosage ICS/LABA                                                                                                                                   | Benralizumab 30mg q4w<br>Benralizumab 30mg q8w<br>Placebo q4w            | Baseline clinical factors and blood eosinophil counts can help identify patients potentially responsive to benralizumab |
| 25   | DuBuske et al. 2018  | SIROCCO<br>CALIMA                          | The same as SIROCCO and CALIMA                                                                                                                         | Benralizumab 30mg q4w<br>Benralizumab 30mg q8w<br>Placebo q4w            | Evaluated the effect of benralizumab treatment on seasonal asthma exacerbation rates                                    |
| 26   | Chipps et al. 2018   | SIROCCO<br>CALIMA                          | Africa, Asia, Europe, North America, and South America                                                                                                 | Benralizumab 30mg q4w<br>Benralizumab 30mg q8w<br>Placebo q4w            | To investigate the efficacy of benralizumab by atopic status and serum IgE concentrations                               |
| 27   | Sehmi et al. 2018    | ZONDA<br>Phase 3                           | From 4 academic centers, we recruited 18 patients with severe asthma and elevated blood eosinophils who relied on OCS therapy to control their disease | Benralizumab 30mg q4w<br>Benralizumab 30mg q8w<br>Placebo q4w            | 28                                                                                                                      |
| 28   | Ohta et al. 2018     | CALIMA                                     | Analysis of the subset of Japanese patients who participated in the CALIMA trial                                                                       | Benralizumab 30mg q4w<br>Benralizumab 30mg q8w<br>Placebo q4w            | 56                                                                                                                      |
| 29   | Goldman et al. 2017  | SIROCCO<br>CALIMA                          | aged $\geq 18$ years                                                                                                                                   | Placebo<br>Benralizumab 30mg q8w                                         |                                                                                                                         |
| 30   | Pham et al. 2016     | Phase I (MI-CP166)<br>Phase IIa (MI-CP197) | Eligible patients aged 20-68 years with asthma were enrolled in two independent, randomized, double-blind, placebo-controlled clinical trials          | Placebo<br>Benralizumab 25mg<br>Benralizumab 100mg<br>Benralizumab 200mg | 52                                                                                                                      |

Table S5. Baseline Characteristics

| List                         | Trial                   | Treatment Arm         |             | N   | Age, mean, years (SD) | Race, (n)                          | Gender, n    | BMI, mean, (SD) | FEV <sub>1</sub> on dosing date |           | FEV <sub>1</sub> /FVC | ACQ-6 score (SD) | AQLQ +12 score (SD) |
|------------------------------|-------------------------|-----------------------|-------------|-----|-----------------------|------------------------------------|--------------|-----------------|---------------------------------|-----------|-----------------------|------------------|---------------------|
| Randomized controlled trials |                         |                       |             |     |                       |                                    |              |                 |                                 |           |                       |                  |                     |
| 1                            | Menzies-Gow et al. 2021 | Tezepelumab           |             | 528 | 49.9 (16.3)           | W:332, O:196                       | M:193 F: 335 | 28.7 (7.1)      | 1.8 (0.7)                       | 62.8±18.0 | -                     | 2.8 (0.8)        | 3.9 (1.0)           |
|                              |                         | Placebo               |             | 531 | 49.0 (15.9)           | W:327; O:204                       | M:531 F:337  | 28.3 (6.9)      | 1.9 (0.7)                       | 62.7±18.0 | -                     | 2.8 (0.8)        | 3.9 (1.0)           |
| 2                            | Harrison et al. 2020    | Benralizuamb          |             | 427 | 52.5 (12.7)           | W:314; B:35; A:11; O:8; H:49; M:62 | M:164 F:263  | 29.85 (7.37)    | 1.63 (0.609)                    | 54.0±14.2 | -                     | 3.04 (0.874)     | -                   |
|                              |                         | Placebo               |             | 229 | 53.3 (12.5)           | W:168; B:18; A:7 O:2; H:25; M:33   | M:93 F:136   | 30.10 (7.89)    | 1.72 (0.629)                    | 55.9±13.6 | -                     | 3.07 (0.965)     | -                   |
| 3                            | Emson et al. 2020       | Nasal polyposis+      | Tezepelumab | 23  | 51.3 (12.7)           | NA                                 | M:8 F:15     | NA              | 1.95 (0.73)                     | -         | -                     | 2.85 (0.91)      | -                   |
|                              |                         |                       | Placebo     | 18  | 55.9 (9.2)            | NA                                 | M:8 F:10     | NA              | 2.00 (0.60)                     | -         | -                     | 2.51 (0.91)      | -                   |
|                              |                         | Nasal polyposis-      | Tezepelumab | 112 | 51.3 (12.7)           | NA                                 | M:42 F:70    | NA              | 1.81 (0.55)                     | -         | -                     | 2.69 (0.78)      | -                   |
|                              |                         |                       | Placebo     | 117 | 53.1 (12.6)           | NA                                 | M:35 F:82    | NA              | 1.80 (0.59)                     | -         | -                     | 2.67 (0.65)      | -                   |
| 4                            | Busse et al., 2019      | Benralizuamb 30mg Q4W | Q4W/Q4W     | 518 | 51.3 (13.3)           | W:398; B:6 A:94; O:20              | M:179 F:339  | 29.0 (7.0)      | 1.95 (0.70)                     | 67.1±17.9 | 63.5±11.7             | 1.5 (1.2)        | 5.39 (1.19)         |
|                              |                         |                       | Plabo/Q4W   | 265 | 49.9 (14.7)           | W:201; B:10 A:44; O:10             | M:101 F:164  | 29.1 (6.7)      | 1.89 (0.79)                     | 62.8±19.7 | 62.0±13.7             | 1.6 (1.2)        | 5.28 (1.32)         |

| List | Trial       | Treatment Arm             |              | N   | Age, mean, years (SD) | Race, (n)                        | Gender, n      | BMI, mean, (SD) | FEV <sub>1</sub> on dosing date<br>liters | FEV <sub>1</sub> /FVC<br>% predicted | FEV <sub>1</sub> /FVC | ACQ-6 score (SD) | AQLQ +12 score (SD) |
|------|-------------|---------------------------|--------------|-----|-----------------------|----------------------------------|----------------|-----------------|-------------------------------------------|--------------------------------------|-----------------------|------------------|---------------------|
|      |             |                           | Total        | 783 | 51.1 (13.8)           | W:599;<br>B:16<br>A:138;<br>O:30 | M:280<br>F:503 | 29.1 (6.9)      | 1.93 (0.73)                               | 65.7±18.6                            | 63.0±12.4             | 1.5 (1.2)        | 5.36 (1.23)         |
|      |             | Benralizumab 30mg Q8W     | Q8W/Q8W      | 512 | 49.3 (14.8)           | W:388;<br>B:12<br>A:92;<br>O:20  | M:205<br>F:307 | 28.4 (6.2)      | 2.02 (0.75)                               | 66.9±19.0                            | 63.0±13.3             | 1.4 (1.1)        | 5.48 (1.14)         |
|      |             |                           | Plabo/Q8W    | 281 | 48.2 (14.8)           | W:224;<br>B:7<br>A:44;<br>O:6    | M:118<br>F:163 | 28.9 (7.1)      | 2.00 (0.82)                               | 66.2±20.0                            | 64.0±13.2             | 1.6 (1.2)        | 5.27 (1.21)         |
|      |             |                           | Total        | 793 | 48.9 (15.5)           | W:612;<br>B:19<br>A:136;<br>O:26 | M:323<br>F:470 | 28.6 (6.5)      | 2.01 (0.78)                               | 66.7±19.3                            | 63.0±13.3             | 1.5 (1.1)        | 5.40 (1.17)         |
| 5    | Corren 2017 | Placebo                   |              | 138 | 52.3 (11.7)           | W:123;<br>B:6<br>A:6; O:2        | M: 44<br>F: 94 | 28.5 (5.6)      | 1.82 (0.59)                               | 60.0±13.5                            | NA                    | 2.66 (0.69)      | 4.09 (0.87)         |
|      |             | Low-dose Tezepelumab      |              | 138 | 50.8 (12.4)           | W:131;<br>B:4<br>A:3; O:0        | M: 49<br>F: 89 | 28.3 (5.1)      | 1.91 (0.67)                               | 60.0±13.7                            | NA                    | 2.72 (0.79)      | 4.17 (0.93)         |
|      |             | Medium-Dose Tezepelumab   |              | 137 | 52.7 (12.3)           | W:128;<br>B:3<br>A:5; O:0        | M: 50<br>F: 87 | 28.5 (4.9)      | 1.83 (0.58)                               | 59.0±12.5                            | NA                    | 2.70 (0.80)      | 4.20 (0.91)         |
|      |             | High-dose Tezepelumab     |              | 137 | 51.3 (12.4)           | W:381;<br>B:13<br>A:13; O:2      | M: 46<br>F: 91 | 27.6 (5.0)      | 1.83 (0.57)                               | 58.8±11.8                            | NA                    | 2.64 (0.74)      | 4.08 (0.91)         |
|      |             |                           | Benralizumab | 28  | 46.4 (16.0)           | W:28;<br>B:0<br>A:0; O:0         | M:14<br>F:14   | 28.6 (7.3)      | 2.403 (0.71)                              | 70.0±12.8                            | 67±9                  | NA               | NA                  |
|      |             | Baseline blood eosinophil | Placebo      | 72  | 51.8 (12.3)           | W:68;<br>B:2<br>A:0; O:2         | M:26<br>F:46   | 29.5 (6.9)      | 2.247 (0.805)                             | 71.7±12.8                            | 67±10                 | NA               | NA                  |



| List | Trial           | Treatment Arm                                                           |                       | N   | Age, mean, years (SD) | Race, (n)                       | Gender, n        | BMI, mean, (SD)         | FEV <sub>1</sub> on dosing date |             | FEV <sub>1</sub> /FVC | ACQ-6 score (SD) | AQLQ +12 score (SD) |
|------|-----------------|-------------------------------------------------------------------------|-----------------------|-----|-----------------------|---------------------------------|------------------|-------------------------|---------------------------------|-------------|-----------------------|------------------|---------------------|
|      |                 |                                                                         |                       |     |                       |                                 |                  |                         | liters                          | % predicted |                       |                  |                     |
|      |                 | count < 300 cells per uL                                                | Benralizumab          | 78  | 49.0 (13.8)           | W:70;<br>B:7<br>A:1; O:0        | M:30<br>F:48     | 30.2 (7.0)              | 2.193 (0.559)                   | 69.5±10.8   | 69±9                  | NA               | NA                  |
| 6    | Nair 2017       | Placebo                                                                 |                       | 75  | 49.9 (11.7)           | NA                              | M: 27 F: 48      | 28.7 (5.2)              | 1.93 (0.662)                    | 62.0±16.5   | 62±13                 | 2.7 (1)          | 4.1 (1.1)           |
|      |                 | Benralizumab q4w                                                        |                       | 72  | 50.2 (12.0)           | NA                              | M: 32 F: 40      | 29.8 (6.8)              | 1.85 (0.741)                    | 57.4±18     | 59±13                 | 2.6 (1.1)        | 4.2 (1.1)           |
|      |                 | Benralizumab q8w                                                        |                       | 73  | 52.9 (10.1)           | NA                              | M: 26 F: 47      | 30.2 (6.5)              | 1.75 (0.635)                    | 59.0±17.9   | 59±12                 | 2.4 (1.2)        | 4.4 (1.2)           |
| 7    | Bleecker 2016   | High-dosage ICS/LABA with baseline blood eosinophils ≥ 300 cells per uL | Placebo               | 267 | 48.6 (14.7)           | W:191;<br>B:10<br>A:36;<br>O:30 | M: 87<br>F: 180  | 28.7 (7.0)              | 1.654                           | 56.4        | 61±13                 | 2.90 (0.95)      | 3.87 (0.99)         |
|      |                 |                                                                         | Benralizumab 30mg q4w | 275 | 49.2 (13.1)           | W:191;<br>B:11<br>A:39;<br>O:34 | M: 102<br>F: 173 | 28.9 (6.9)              | 1.673                           | 56.5        | 62±12                 | 2.77 (0.95)      | 3.93 (1.00)         |
|      |                 |                                                                         | Benralizumab 30mg q8w | 267 | 47.6 (14.6)           | W:192;<br>B:10<br>A:35;<br>O:30 | M: 93<br>F: 174  | 27.7 (6.1)              | 1.66                            | 55.5        | 60±13                 | 2.81 (0.89)      | 3.93 (0.97)         |
|      |                 | High-dosage ICS/LABA with baseline blood eosinophils < 300 cells per uL | Placebo               | 140 | 49.0 (15.3)           | W:111;<br>B:6<br>A:14;<br>O:9   | M: 51<br>F: 89   | 29.3 (7.1)              | 1.672                           | 57          | 62±13                 | 2.82 (0.93)      | 3.97 (1.07)         |
|      |                 |                                                                         | Benralizumab 30mg q4w | 124 | 52.0 (13.9)           | W:94;<br>B:4<br>A:15;<br>O:11   | M: 22<br>F: 102  | 29.9 (7.3)              | 1.615                           | 59.4        | 63±12                 | 2.78 (1.00)      | 3.92 (0.95)         |
|      |                 |                                                                         | Benralizumab 30mg q8w | 131 | 47.8 (14.3)           | W:95;<br>B:5<br>A:15;<br>O:16   | M: 53<br>F: 78   | 29.3 (6.2)              | 1.721                           | 57.3        | 62±14                 | 2.78 (0.85)      | 3.97 (1.04)         |
| 8    | FitzGerald 2016 | High-dosage ICS/LABA                                                    | Placebo               | 248 | 48.5 (14.1)           | W:213;<br>B:8                   | M: 103<br>F: 145 | 29.0 (6.1) <sup>1</sup> | 1.815                           | 58.2        | 60±12                 | 2.75 (0.94)      | 3.93 (1.04)         |

<sup>1</sup> Data not available for all randomized patients

| List | Trial              | Treatment Arm                                                                | N                     | Age, mean, years (SD) | Race, (n)   | Gender, n                     | BMI, mean, (SD)  | FEV <sub>1</sub> on dosing date<br>liters | FEV <sub>1</sub> /FVC<br>% predicted | ACQ-6 score (SD)       | AQLQ +12 score (SD)    |             |             |
|------|--------------------|------------------------------------------------------------------------------|-----------------------|-----------------------|-------------|-------------------------------|------------------|-------------------------------------------|--------------------------------------|------------------------|------------------------|-------------|-------------|
|      |                    | with baseline blood eosinophils ≥ 300 cells per uL                           |                       |                       |             | A:27;<br>O:0                  |                  |                                           |                                      |                        |                        |             |             |
|      |                    |                                                                              | Benralizumab 30mg q4w | 241                   | 50.1 (13.1) | W:209;<br>B:5<br>A:27;<br>O:0 | M: 82<br>F: 159  | 29.1 (7.3) <sup>1</sup>                   | 1.75                                 | 59.1                   | 61±12                  | 2.70 (0.91) | 3.99 (0.98) |
|      |                    |                                                                              | Benralizumab 30mg q8w | 239                   | 49.6 (13.0) | W:203;<br>B:8<br>A:28;<br>O:0 | M: 101<br>F: 138 | 28.6 (6.1) <sup>1</sup>                   | 1.758                                | 57                     | 60±13                  | 2.80 (0.95) | 3.87 (1.05) |
|      |                    | High-dosage ICS plus LABA with baseline blood eosinophils < 300 cells per uL | Placebo               | 122                   | 52.4 (14.4) | W:108;<br>B:4<br>A:10;<br>O:0 | M: 46 F: 76      | 29.7 (7.4) <sup>1</sup>                   | 1.639                                | 56.1                   | 60±13                  | 2.68 (0.89) | 4.03 (1.01) |
|      |                    |                                                                              | Benralizumab 30mg q4w | 116                   | 51.9 (12.2) | W:99;<br>B:3<br>A:14;<br>O:0  | M: 45<br>F: 71   | 28.8 (6.5) <sup>1</sup>                   | 1.717                                | 57.4                   | 59±13                  | 2.82 (0.89) | 3.95 (0.93) |
|      |                    |                                                                              | Benralizumab 30mg q8w | 125                   | 51.1 (13.8) | W:107;<br>B:5<br>A:12;<br>O:1 | M: 38 F: 87      | 29.8 (7.2) <sup>1</sup>                   | 1.665                                | 56.7                   | 60±14                  | 2.87 (0.96) | 3.82 (0.97) |
| 9    | Park 2016          | Placebo                                                                      |                       | 26                    | 50.8 (11.8) | J:11 S:15                     | M: 9 F: 17       | 24.4                                      | NA                                   | 68.8±16.3 <sup>2</sup> | 65.2±13.7 <sup>3</sup> | 1.6 (0.6)   | NA          |
|      |                    | Benralizumab 2mg                                                             |                       | 26                    | 53.2 (11.3) | J:11 S:15                     | M: 13 F: 13      | 24.9                                      | NA                                   | 65.3±14.1 <sup>2</sup> | 66.3±12 <sup>3</sup>   | 1.8 (0.6)   | NA          |
|      |                    | Benralizumab 20mg                                                            |                       | 25                    | 55.6 (8.9)  | J:11 S:14                     | M: 6 F: 19       | 25.3                                      | NA                                   | 70.6±13.2 <sup>2</sup> | 68.6±10.8 <sup>3</sup> | 1.9 (0.7)   | NA          |
|      |                    | Benralizumab 100mg                                                           |                       | 26                    | 51.4 (13.8) | J:11 S:15                     | M: 10 F: 16      | 24.5                                      | NA                                   | 67.5±15.8 <sup>2</sup> | 67.8±9.3 <sup>3</sup>  | 1.9 (0.8)   | NA          |
| 10   | Castro et al. 2014 | Eosinophilic <sup>4</sup>                                                    | Placebo               | 80                    | 45.6 (11.7) | W: 66%                        | M:27<br>F:53     | 28.8 (6.0)                                | NA                                   | 65.0±15.3              | 62.1±11.3              | 2.7 (1.0)   | 3.6 (1.2)   |

<sup>2</sup> N=24 in each group, FEV<sub>1</sub> (actual)/ FEV<sub>1</sub> (predicted)\*100, data that did not meet ATS/ERS criteria were deleted

<sup>3</sup> N=24 in each group, data that did not meet ATS/ERS criteria were deleted, FEV<sub>1</sub>/ FVC \*100,

<sup>4</sup> Eosinophilic refers to ELEN index positive or FeNO≥50 ppb; non-eosinophilic refers to ELEN index negative and FeNO<50 ppb

| List | Trial           | Treatment Arm               |                     | N   | Age, mean, years (SD)         | Race, (n)                 | Gender, n      | BMI, mean, (SD)         | FEV <sub>1</sub> on dosing date<br>liters | FEV <sub>1</sub> /FVC<br>% predicted | FEV <sub>1</sub> /FVC | ACQ-6 score (SD) | AQLQ +12 score (SD) |
|------|-----------------|-----------------------------|---------------------|-----|-------------------------------|---------------------------|----------------|-------------------------|-------------------------------------------|--------------------------------------|-----------------------|------------------|---------------------|
|      |                 |                             | Benralizumab 2mg    | 81  | 47.1 (12.8)                   | W: 73%                    | M:23<br>F:58   | 29.2 (6.5)              | NA                                        | 65.1±15.2                            | 64.9±11.0             | 2.6 (1.0)        | 3.7 (1.2)           |
|      |                 |                             | Benralizumab 20mg   | 81  | 46.6 (13.2)                   | W: 62%                    | M:33<br>F:48   | 28.0 (5.2)              | NA                                        | 64.8±14.8                            | 63.3±10.9             | 2.5 (0.9)        | 3.8 (1.1)           |
|      |                 |                             | Benralizumab 100mg  | 82  | 47.8 (12.9)                   | W: 76%                    | M:22<br>F:60   | 29.6 (5.0)              | NA                                        | 66.1±15.9                            | 63.9±11.5             | 2.5 (1.0)        | 3.7 (1.0)           |
|      |                 | Non-eosinophilic            | Placebo             | 142 | 50.0 (12.3)                   | W: 75%                    | M:42<br>F:100  | 29.5 (6.0)              | NA                                        | 69.1±14.5                            | 66.9±11.4             | 2.5 (0.8)        | 3.8 (1.0)           |
|      |                 |                             | Benralizumab 100mg  | 140 | 50.0 (11.5)                   | W: 71%                    | M:42<br>F:98   | 30.2 (7.0)              | NA                                        | 66.8±15.1                            | 65.1±11.4             | 2.6 (0.8)        | 3.7 (1.0)           |
| 11   | Nowak 2015      | Placebo                     |                     | 38  | Mean (Range):<br>35.9 (22-55) | W:11;<br>B:26<br>A:0; O:1 | M: 8<br>F: 30  | 34.7 (8.9)              | 1.68                                      | 56.1                                 | NA                    | 3.64 (0.83)      | 3.10 (0.90)         |
|      |                 | Benralizumab 0.3mg/kg       |                     | 36  | Mean (Range):<br>37.9 (20-60) | W:14;<br>B:19<br>A:0; O:3 | M: 12<br>F: 24 | 30.1 (8.1)              | 1.69                                      | 53.1                                 | NA                    | 3.72 (1.18)      | 3.18 (0.95)         |
|      |                 | Benralizumab 1.0mg/kg       |                     | 36  | Mean (Range):<br>34.8 (19-54) | W:16;<br>B:19<br>A:0; O:1 | M: 13<br>F: 23 | 30.8 (8.3)              | 2.07                                      | 63.3                                 | NA                    | 3.26 (1.27)      | 3.35 (1.11)         |
|      |                 | Benralizumab Total          |                     | 72  | Mean (Range):<br>36.3 (19-60) | W:30;<br>B:38<br>A:0; O:4 | M: 25<br>F: 47 | 30.5 <sup>‡</sup> (8.2) | 1.88 <sup>‡</sup>                         | 58.1                                 | NA                    | 3.49 (1.24)      | 3.27 (1.03)         |
| 12   | Laviolette 2013 | Cohort 1 (single-dose IV)   | Placebo             | 5   | 34.4 (9.7)                    | W:4<br>O:1                | M: 3<br>F: 2   | NA                      | 2.5 (0.8)                                 | 67.2±9.1 <sup>5</sup>                | 66.7±10               | NA               | NA                  |
|      |                 |                             | Benralizumab 1mg/kg | 8   | 38.9 (14.7)                   | W:8<br>O:0                | M: 2<br>F: 6   | NA                      | 2.3 (0.6)                                 | 70.5±15.6                            | 70.7±9.8              | NA               | NA                  |
|      |                 | Cohort 2 (multiple-dose SC) | Placebo             | 5   | 40.2 (14.5)                   | W:5<br>O:0                | M: 1<br>F: 4   | NA                      | 1.9 (0.4)                                 | 60.5±6.6                             | 67±12.7               | NA               | NA                  |
|      |                 |                             | Benralizumab 100mg  | 4   | 41.0 (14.9)                   | W:4<br>O:0                | M: 3<br>F: 1   | NA                      | 3.0 (1.2)                                 | 72.5±13.1                            | 69.6±5.9              | NA               | NA                  |
|      |                 |                             | Benralizumab 200mg  | 5   | 37.2 (14.4)                   | W:4<br>O:1                | M: 2<br>F: 3   | NA                      | 2.2 (0.6)                                 | 65.7±10.2                            | 67.2±4.2              | NA               | NA                  |
|      |                 |                             | Benralizumab Total  | 9   | 38.9 (13.8)                   | W:8<br>O:1                | M: 5<br>F: 4   | NA                      | 2.6 (1.0)                                 | 68.7±11.4                            | 68.3±4.8              | NA               | NA                  |

<sup>5</sup> Screening postbronchodilator FEV<sub>1</sub> predicted (%) and screening prebronchodilator FEV<sub>1</sub>/FVC(%) were used as part of the eligibility criteria

| List          | Trial                | Treatment Arm                                  | N    | Age, mean, years (SD) | Race, (n)                         | Gender, n      | BMI, mean, (SD) | FEV <sub>1</sub> on dosing date<br>liters | FEV <sub>1</sub> /FVC<br>% predicted | ACQ-6 score (SD) | AQLQ +12 score (SD) |           |
|---------------|----------------------|------------------------------------------------|------|-----------------------|-----------------------------------|----------------|-----------------|-------------------------------------------|--------------------------------------|------------------|---------------------|-----------|
| Post-analysis |                      |                                                |      |                       |                                   |                |                 |                                           |                                      |                  |                     |           |
| 19            | Lugogo et al. 2020   | BEC maintenance                                | 260  | 51.2 (12.9)           | W:209;<br>B:9<br>A:34;<br>O:8     | M:85<br>F:175  | 28.6 (6.3)      | 1.639±0.544                               | 55.8±13.9                            | 59.5±12.4        | 2.8 (0.9)           | NA        |
|               |                      | BEC group shift                                | 474  | 50.7 (12.7)           | W:378;<br>B:18<br>A:52;<br>O:26   | M:174<br>F:300 | 29.8 (6.9)      | 1.687±0.610                               | 56.3±14.6                            | 60.5±12.5        | 2.8 (0.9)           | NA        |
| 21            | Chipps et al. 2020   | FAO+                                           | 935  | 51.3 (12.5)           | W:745;<br>B:29<br>A:114;<br>O:47  | M:384<br>F:551 | 28.6 (6.1)      | 1.569±0.569                               | 52.0±13.6                            | NA               | 2.8 (0.9)           | 3.9 (1.0) |
|               |                      | FAO-                                           | 558  | 44.7 (14.9)           | W:416;<br>B:19<br>A:77;<br>O:46   | M:175<br>F:383 | 28.7 (7.2)      | 1.961±0.568                               | 65.2±11.3                            | NA               | 2.7 (1.0)           | 4.0 (1.0) |
| 24            | Bleecker et al. 2018 | Placebo                                        | 777  | 49.2 (14.6)           | W:623;<br>B:28<br>A:87;<br>O:39   | M:287<br>F:490 | 29.1 (6.8)      | 1.71±0.61                                 | 57.0±14.9                            | 61±13            | 2.8 (0.9)           | 3.9 (1.0) |
|               |                      | Benralizumab 30mg q4w                          | 756  | 50.4 (13.2)           | W:593;<br>B:23<br>A:95;<br>O:45   | M:251<br>F:505 | 29.1 (7.0)      | 1.70±0.57                                 | 57.9±14.3                            | 61±12            | 2.8 (0.9)           | 4.0 (1.0) |
|               |                      | Benralizumab 30mg q8w                          | 762  | 48.8 (14.0)           | W:597;<br>B:28<br>A:90;<br>O:47   | M:285<br>F:477 | 28.6 (6.3)      | 1.70±0.60                                 | 56.5±14.6                            | 60±13            | 2.8 (0.9)           | 3.9 (1.0) |
| 26            | Chipps et al. 2018   | Met atopy and IgE 30-700kU/L criteria          | 824  | 47.3 (14.2)           | W:611;<br>B:34<br>A:122;<br>O:57  | M:308<br>F:516 | 28.5 (6.4)      | 1.754±0.607                               | 57.9±14.2                            | NA               | 2.7 (0.9)           | 4.0 (1.0) |
|               |                      | Did not meet atopy and IgE 30-700kU/L criteria | 1471 | 50.7 (13.6)           | W:1202;<br>B:45<br>A:150;<br>O:74 | M:515<br>F:936 | 29.2 (6.9)      | 1.671±0.587                               | 56.7±14.8                            | NA               | 2.8 (0.9)           | 3.9 (1.0) |

| List | Trial               | Treatment Arm                                                                        |                       | N    | Age, mean, years (SD)        | Race, (n)                         | Gender, n      | BMI, mean, (SD) | FEV <sub>1</sub> on dosing date |             | FEV <sub>1</sub> /FVC | ACQ-6 score (SD) | AQLQ +12 score (SD) |
|------|---------------------|--------------------------------------------------------------------------------------|-----------------------|------|------------------------------|-----------------------------------|----------------|-----------------|---------------------------------|-------------|-----------------------|------------------|---------------------|
|      |                     |                                                                                      |                       |      |                              |                                   |                |                 | liters                          | % predicted |                       |                  |                     |
|      |                     | IgE high (≥150kU/L)                                                                  |                       | 1204 | 47.7 (14.5)                  | W:887;<br>B:52<br>A:176;<br>O:89  | M:488<br>F:716 | 28.7 (6.8)      | 1.748±0.614                     | 57.5±14.6   | NA                    | 2.8 (0.9)        | 4.0 (1.0)           |
|      |                     | IgE low                                                                              |                       | 1053 | 51.4 (13.1)                  | W:896;<br>B:26<br>A:92;<br>O:39   | M:316<br>F:737 | 29.3 (6.8)      | 1.650±0.568                     | 56.9±14.5   | NA                    | 2.8 (0.9)        | 3.9 (1.0)           |
|      |                     | Atopy                                                                                |                       | 1375 | 46.8 (14.6)                  | W:1018;<br>B:63<br>A:196;<br>O:98 | M:521<br>F:824 | 29.0 (7.0)      | 1.775±0.615                     | 58.0±14.4   | NA                    | 2.7 (0.9)        | 4.0 (1.0)           |
|      |                     | No atopy                                                                             |                       | 883  | 53.5 (12.0)                  | W:768;<br>B:15<br>A:72;<br>O:28   | M:256<br>F:627 | 28.9 (6.3)      | 1.588±0.541                     | 56.0±14.7   | NA                    | 2.9 (0.9)        | 3.8 (1.0)           |
| 28   | Ohta 2018           | Placebo                                                                              |                       | 16   | Median(Range):<br>47 (29-70) | A:16                              | M:3<br>F:13    | 27.5 (4.8)      | 1.616±0.652                     | 61.9±11.4   | 60±10                 | NA               | NA                  |
|      |                     | Benralizumab q4w                                                                     |                       | 15   | Median(Range):<br>54(34-72)  | A:15                              | M:5<br>F:10    | 24.5 (4.2)      | 1.466±0.488                     | 57.7±15.6   | 63±9                  | NA               | NA                  |
|      |                     | Benralizumab q8w                                                                     |                       | 15   | Median(Range):<br>49 (31-66) | A:15                              | M:6<br>F:9     | 25.3 (3.9)      | 1.721±0.506                     | 61.3±12.5   | 66±12                 | NA               | NA                  |
| 29   | Goldman et al. 2017 | [SIROCCO]<br>High-dosage ICS/LABA with baseline blood eosinophils ≥ 150 cells per uL | Placebo               | 306  | 50.8 (12.6)                  | W:221;<br>B:12<br>A:41;<br>O:32   | M:96<br>F:210  | 29.0 (6.8)      | 1.600±0.553                     | 55.1±14.3   | 61±13                 | 2.90 (0.96)      | 3.89 (1.01)         |
|      |                     |                                                                                      | Benralizumab 30mg Q8W | 325  | 49.6 (12.7)                  | W:239;<br>B:11<br>A:40;<br>O:35   | M:114<br>F:211 | 28.4 (5.9)      | 1.665±0.576                     | 55.6±14.3   | 60±12                 | 2.82 (0.88)      | 3.90 (0.97)         |
|      |                     | [SIROCCO]<br>High-dosage ICS/LABA with baseline blood eosinophils <                  | Placebo               | 74   | 51.6 (12.0)                  | W:59;<br>B:3<br>A:8; O:4          | M:25<br>F:49   | 30.8 (7.5)      | 1.664±0.606                     | 56.9±15.4   | 60±12                 | 2.85 (0.90)      | 3.79 (1.01)         |
|      |                     |                                                                                      | Benralizumab 30mg Q8W | 48   | 48.3 (12.6)                  | W:30;<br>B:2<br>A:9; O:7          | M:19<br>F:29   | 29.2 (5.2)      | 1.590±0.518                     | 54.3±15.1   | 62±14                 | 2.72 (0.88)      | 4.01 (1.11)         |

| List | Trial     | Treatment Arm                                                                         | N                     | Age, mean, years (SD) | Race, (n)                    | Gender, n             | BMI, mean, (SD) | FEV <sub>1</sub> on dosing date<br>liters | FEV <sub>1</sub> on dosing date<br>% predicted | FEV <sub>1</sub> /FVC | ACQ-6 score (SD)                 | AQLQ +12 score (SD) |             |
|------|-----------|---------------------------------------------------------------------------------------|-----------------------|-----------------------|------------------------------|-----------------------|-----------------|-------------------------------------------|------------------------------------------------|-----------------------|----------------------------------|---------------------|-------------|
|      |           | 150 cells per uL                                                                      |                       |                       |                              |                       |                 |                                           |                                                |                       |                                  |                     |             |
|      |           | [CALIMA] High-dosage ICS/LABA with baseline blood eosinophils ≥ 150 cells per uL      | Placebo               | 315                   | 50.6 (12.9)                  | W:273; B:11 A:31; O:0 | M:125 F:190     | 29.6 (6.4)                                | 1.759±0.614                                    | 57.7±14.1             | 60±12                            | 2.71 (0.92)         | 3.96 (1.03) |
|      |           |                                                                                       | Benralizumab 30mg Q8W | 300                   | 51.0 (11.8)                  | W:255; B:12 A:32; O:1 | M:119 F:181     | 29.1 (6.1)                                | 1.720±0.623                                    | 56.3±14.3             | 59±13                            | 2.81 (0.93)         | 3.86 (1.02) |
|      |           | [CALIMA] High-dosage ICS plus LABA with baseline blood eosinophils < 150 cells per uL | Placebo               | 40                    | 53.3 (13.5)                  | W:34; B:0 A:6; O:0    | M:15 F:25       | 28.5 (7.6)                                | 1.474±0.535                                    | 50.4±15.5             | 57±14                            | 2.92 (0.86)         | 3.89 (0.89) |
|      |           |                                                                                       | Benralizumab 30mg Q8W | 48                    | 52.3 (13.5)                  | W:42; B:0 A:6; O:0    | M:14 F:34       | 29.1 (7.5)                                | 1.710±0.614                                    | 58.6±14.1             | 61±16                            | 2.89 (1.05)         | 3.79 (0.95) |
| 30   | Pham 2016 | MI-CP166                                                                              | Placebo               | 5                     | Median (Range): 37.0 (23-60) | W:5                   | M:1 F:4         | Median (Range): 25.5 (21.7-40.9)          | Median (Range): 1.8 (1.36-4.6)                 | 60.5±6.6              | Median (Range): 70.2 (45.0-77.0) | NA                  | NA          |
|      |           |                                                                                       | Benralizumab 100mg    | 4                     | Median (Range): 45.5 (20-53) | W:4                   | M:3 F:1         | Median (Range): 29.3 (25.0-34.5)          | Median (Range): 2.9 (1.7-4.6)                  | 72.5±13.1             | Median (Range): 71.0 (60.0-74.1) | NA                  | NA          |
|      |           |                                                                                       | Benralizumab 200mg    | 5                     | Median (Range): 32.0 (26-62) | W:4 O:1               | M:2 F:3         | Median (Range): 31.2 (22.7-32.0)          | Median (Range): 2.5 (1.4-2.9)                  | 65.7±10.2             | Median (Range): 69.3 (60.2-71.4) | NA                  | NA          |

| List | Trial | Treatment Arm | N                  | Age, mean, years (SD) | Race, (n)                    | Gender, n  | BMI, mean, (SD) | FEV <sub>1</sub> on dosing date<br>liters | FEV <sub>1</sub> on dosing date<br>% predicted | FEV <sub>1</sub> /FVC             | ACQ-6 score (SD)                 | AQLQ +12 score (SD) |    |
|------|-------|---------------|--------------------|-----------------------|------------------------------|------------|-----------------|-------------------------------------------|------------------------------------------------|-----------------------------------|----------------------------------|---------------------|----|
|      |       | MI-CP197      | Placebo            | 6                     | Median (Range): 44.0 (30-60) | W:4<br>O:2 | M: 3<br>F: 3    | Median (Range): 27.8 (25.0-36.1)          | Median (Range): 3.0 (2.0-4.1)                  | Median (Range): 88.0 (58.0-111.0) | Median (Range): 70.0 (62.0-79.0) | NA                  | NA |
|      |       |               | Benralizumab 25mg  | 6                     | Median (Range): 49.0 (36-64) | W:5<br>O:1 | M: 3<br>F: 3    | Median (Range): 30.0 (23.4-38.8)          | Median (Range): 2.6 (1.7-3.2)                  | Median (Range): 75.0 (61.0-81.0)  | Median (Range): 68.0 (56.0-79.0) | NA                  | NA |
|      |       |               | Benralizumab 100mg | 6                     | Median (Range): 44.0 (31-68) | W:4<br>O:2 | M: 2<br>F: 4    | Median (Range): 25.8 (20.9-44.5)          | Median (Range): 2.4 (2.2-2.8)                  | Median (Range): 82.0 (61.0-87.0)  | Median (Range): 73.0 (61.0-84.0) | NA                  | NA |
|      |       |               | Benralizumab 200mg | 6                     | Median (Range): 35.0 (27-62) | W:6<br>O:0 | M: 3<br>F: 3    | Median (Range): 28.9 (25.0-32.9)          | Median (Range): 2.4 (2.0-2.8)                  | Median (Range): 67.0 (61.0-76.0)  | Median (Range): 66.0 (62.0-72.0) | NA                  | NA |

**Table S6 Summary of Annual Exacerbation rate**

| List | Trial                   | Treatment arm            | Subjects    | Crude annual rate (95% CI) | Absolute difference estimate | Relative reduction vs. placebo | p value vs. placebo |
|------|-------------------------|--------------------------|-------------|----------------------------|------------------------------|--------------------------------|---------------------|
| 1    | Menzies-Gow et al. 2021 | ≥ 300 Eosinophils per uL | Placebo     | 222                        | 2.66                         | -                              |                     |
|      |                         |                          | Tezepelumab | 219                        | 0.79                         | 0.30 (0.22-0.40)               |                     |
|      |                         | < 300 Eosinophils per uL | Placebo     | 309                        | 1.73                         | -                              |                     |
|      |                         |                          | Tezepelumab | 309                        | 1.02                         | 0.59 (0.46-0.75)               |                     |
|      |                         | ≥ 150 Eosinophils per uL | Placebo     | 393                        | 2.24                         | -                              |                     |
|      |                         |                          | Tezepelumab | 390                        | 0.89                         | 0.39 (0.32-0.49)               |                     |
|      |                         |                          | Placebo     | 138                        | 1.70                         | -                              |                     |

| List | Trial                | Treatment arm               | Subjects          | Crude annual rate<br>(95% CI) | Absolute<br>difference estimate | Relative<br>reduction vs.<br>placebo | p value<br>vs.<br>placebo |   |
|------|----------------------|-----------------------------|-------------------|-------------------------------|---------------------------------|--------------------------------------|---------------------------|---|
|      |                      | < 150 Eosinophils<br>per uL | Tezepelumab       | 138                           | 1.04                            |                                      | 0.61 (0.42-0.88)          |   |
|      |                      | FeNO ≥ 25                   | Placebo           | 307                           | 2.52                            |                                      | -                         |   |
|      |                      |                             | Tezepelumab       | 309                           | 0.82                            |                                      | 0.32 (0.25-0.42)          |   |
|      |                      | FeNO < 25                   | Placebo           | 220                           | 1.57                            |                                      | -                         |   |
|      |                      |                             | Tezepelumab       | 213                           | 1.07                            |                                      | 0.68 (0.51-0.92)          |   |
| 3    | Emson et<br>al. 2020 | NP+                         | Placebo           | 18                            | 1.08                            |                                      | -                         |   |
|      |                      |                             | Tezepelumab       | 23                            | 0.29                            |                                      | 0.25 (0.07-0.85)          |   |
|      |                      | NP-                         | Placebo           | 117                           | 0.68                            |                                      | -                         |   |
|      |                      |                             | Tezepelumab       | 112                           | 0.19                            |                                      | 0.27 (0.14-0.53)          |   |
| 4    | Busse et al.<br>2018 | ≥ 300 cells per uL          | Q4W/Q4W group     | 347                           | 0.48 (0.42-0.56)                |                                      |                           |   |
|      |                      |                             | Placebo/Q4W group | 172                           | 0.53 (0.43-0.65)                |                                      |                           |   |
|      |                      |                             | Total             | 519                           | 0.50 (0.44-0.56)                |                                      |                           |   |
|      |                      |                             | Q8W/Q8W group     | 339                           | 0.46 (0.39-0.53)                |                                      |                           |   |
|      |                      |                             | Placebo/Q8W group | 188                           | 0.57 (0.47-0.68)                |                                      |                           |   |
|      |                      |                             | Total             | 527                           | 0.49 (0.44-0.56)                |                                      |                           |   |
|      |                      | < 300 cells per uL          | Q4W/Q4W group     | 171                           | 0.74 (0.62-0.88)                |                                      |                           |   |
|      |                      |                             | Placebo/Q4W group | 93                            | 0.80 (0.64-1.00)                |                                      |                           |   |
|      |                      |                             | Total             | 264                           | 0.76 (0.66-0.87)                |                                      |                           |   |
|      |                      |                             | Q8W/Q8W group     | 173                           | 0.59 (0.49-0.71)                |                                      |                           |   |
|      |                      |                             | Placebo/Q8W group | 93                            | 0.74 (0.59-0.94)                |                                      |                           |   |
|      |                      |                             | Total             | 266                           | 0.64 (0.55-0.74)                |                                      |                           |   |
| 5    |                      | Total                       | Placebo           | 138                           | 0.72 [0.61 – 0.86] <sup>6</sup> |                                      | -                         | - |

<sup>6</sup> 90% CI



| List | Trial                   | Treatment arm                                   | Subjects                 | Crude annual rate<br>(95% CI) | Absolute<br>difference estimate | Relative<br>reduction vs.<br>placebo | p value<br>vs.<br>placebo        |         |
|------|-------------------------|-------------------------------------------------|--------------------------|-------------------------------|---------------------------------|--------------------------------------|----------------------------------|---------|
|      | Corren et<br>al. 2017   |                                                 | Tezepelumab 70mg<br>q4w  | 138                           | 0.27 [0.20 – 0.36] <sup>6</sup> |                                      | 0.62 (0.42-0.75) <sup>6</sup>    | <0.001  |
|      |                         |                                                 | Tezepelumab 210mg<br>q4w | 137                           | 0.20 [0.14 – 0.28] <sup>6</sup> |                                      | 0.71 (0.54-0.82) <sup>6</sup>    | <0.001  |
|      |                         |                                                 | Tezepelumab 280mg<br>q2w | 137                           | 0.23 [0.17 – 0.32] <sup>6</sup> |                                      | 0.66 (0.47-0.79) <sup>6</sup>    | <0.001  |
|      |                         | ≥ 250 Eosinophils<br>per uL                     | Placebo                  | 78                            | 0.78 [0.59 – 1.00]              |                                      | -                                | -       |
|      |                         |                                                 | Tezepelumab 70mg<br>q4w  | 80                            | 0.29 [0.18 – 0.43]              |                                      | 0.65 (0.30-0.82)                 | 0.003   |
|      |                         |                                                 | Tezepelumab 210mg<br>q4w | 76                            | 0.26 [0.16 – 0.42]              |                                      | 0.65 (0.27-0.83)                 | 0.005   |
|      |                         |                                                 | Tezepelumab 280mg<br>q2w | 76                            | 0.21 [0.12 – 0.35]              |                                      | 0.72 (0.40-0.87)                 | 0.001   |
|      |                         | < 250 Eosinophils<br>per uL                     | Placebo                  | 60                            | 0.65 [0.46 – 0.89]              |                                      | -                                | -       |
|      |                         |                                                 | Tezepelumab 70mg<br>q4w  | 58                            | 0.25 [0.14 – 0.42]              |                                      | 0.60 (0.12-0.81)                 | 0.022   |
|      |                         |                                                 | Tezepelumab 210mg<br>q4w | 61                            | 0.14 [0.06 – 0.27]              |                                      | 0.79 (0.48-0.92)                 | <0.001  |
|      |                         |                                                 | Tezepelumab 280mg<br>q2w | 61                            | 0.26 [0.14 – 0.43]              |                                      | 0.58 (0.11-0.80)                 | 0.024   |
| 7    | Bleecker et<br>al. 2016 | High-dosage ICS<br>/LABA with<br>baseline blood | Placebo                  | 267                           | 1.33 (1.12-1.58) <sup>7</sup>   | -                                    | -                                | -       |
|      |                         |                                                 | Benralizumab 30mg<br>Q4W | 275                           | 0.73 (0.60-0.89) <sup>7</sup>   | -0.60 (-0.87 to -0.33)               | 0.55 (0.42 to 0.71) <sup>8</sup> | <0.0001 |

<sup>7</sup> Estimates calculated using a negative binomial model, with adjustment for treatment, region, oral corticosteroid use at time of randomization, and previous exacerbations

<sup>8</sup> Rate ratio vs. placebo

| List | Trial                     | Treatment arm                                                                                 |                          | Subjects | Crude annual rate<br>(95% CI) | Absolute<br>difference estimate | Relative<br>reduction vs.<br>placebo | p value<br>vs.<br>placebo |
|------|---------------------------|-----------------------------------------------------------------------------------------------|--------------------------|----------|-------------------------------|---------------------------------|--------------------------------------|---------------------------|
|      |                           | eosinophils $\geq$ 300<br>cells per uL                                                        | Benralizumab 30mg<br>Q8W | 267      | 0.65 (0.53-0.80) <sup>7</sup> | -0.68 (-0.95 to -0.42)          | 0.49 (0.37 to 0.64) <sup>8</sup>     | <0.0001                   |
|      |                           | High-dosage ICS/<br>LABA with<br>baseline blood<br>eosinophils < 300<br>cells per uL          | Placebo                  | 140      | 1.21 (0.96-1.52) <sup>7</sup> | -                               | -                                    | -                         |
|      |                           |                                                                                               | Benralizumab 30mg<br>Q4W | 124      | 0.85 (0.65-1.11) <sup>7</sup> | -0.36 (-0.71 to 0.00)           | 0.70 (0.50 to 1.00) <sup>8</sup>     | 0.0471                    |
|      |                           |                                                                                               | Benralizumab 30mg<br>Q8W | 131      | 1.00 (0.78-1.28) <sup>7</sup> | -0.21 (-0.58 to 0.16)           | 0.83 (0.59 to 1.16) <sup>8</sup>     | 0.2685                    |
| 8    | FitzGerald<br>et al. 2016 | High-dosage ICS<br>plus LABA with<br>baseline blood<br>eosinophils $\geq$ 300<br>cells per uL | Placebo                  | 248      | 0.93 (0.77-1.12) <sup>7</sup> | -                               | -                                    | -                         |
|      |                           |                                                                                               | Benralizumab 30mg<br>Q4W | 241      | 0.60 (0.48-0.74) <sup>7</sup> | -0.33 (-0.54 to -0.12)          | 0.64 (0.49 to 0.85)                  | 0.0018                    |
|      |                           |                                                                                               | Benralizumab 30mg<br>Q8W | 239      | 0.66 (0.54-0.82) <sup>7</sup> | -0.26 (-0.48 to -0.04)          | 0.72 (0.54 to 0.95)                  | 0.0188                    |
|      |                           | High-dosage ICS<br>plus LABA with<br>baseline blood<br>eosinophils < 300<br>cells per uL      | Placebo                  | 122      | 1.21 (0.96-1.52) <sup>7</sup> | -                               | -                                    | -                         |
|      |                           |                                                                                               | Benralizumab 30mg<br>Q4W | 116      | 0.78 (0.59-1.02) <sup>7</sup> | -0.43 (-0.78 to -0.08)          | 0.64 (0.45 to 0.92)                  | 0.015                     |
|      |                           |                                                                                               | Benralizumab 30mg<br>Q8W | 125      | 0.73 (0.55-0.95) <sup>7</sup> | -0.48 (-0.82 to -0.14)          | 0.60 (0.42 to 0.86)                  | 0.0048                    |
| 10   | Castro et<br>al. 2014     | Eosinophilic                                                                                  | Placebo                  | 80       | Mean (SD) 0.57 (0.75)         |                                 | -                                    | -                         |
|      |                           |                                                                                               | Benralizumab 2mg         | 81       | Mean (SD) 0.65 (0.81)         |                                 | -0.09 (-0.59-0.26) <sup>9</sup>      | 0.781                     |
|      |                           |                                                                                               | Benralizumab 20mg        | 81       | Mean (SD) 0.37 (0.61)         |                                 | 0.36 (0.03-0.58) <sup>9</sup>        | 0.173                     |
|      |                           |                                                                                               | Benralizumab 100mg       | 82       | Mean (SD) 0.34 (0.58)         |                                 | 0.41 (0.11-0.60) <sup>9</sup>        | 0.096                     |
|      |                           | Non-eosinophilic                                                                              | Placebo                  | 142      | Mean (SD) 0.56 (0.75)         |                                 | -                                    | -                         |
|      |                           |                                                                                               | Benralizumab 100mg       | 140      | Mean (SD) 0.43 (0.66)         |                                 | 0.22 (-0.05-0.42) <sup>9</sup>       | 0.284                     |

<sup>9</sup> 80% CI

| List | Trial                  | Treatment arm                                            | Subjects           | Crude annual rate<br>(95% CI) | Absolute<br>difference estimate | Relative<br>reduction vs.<br>placebo | p value<br>vs.<br>placebo |
|------|------------------------|----------------------------------------------------------|--------------------|-------------------------------|---------------------------------|--------------------------------------|---------------------------|
|      |                        | Baseline blood<br>eosinophil count<br>≥300 cells per uL  | Placebo            | 83                            | Mean (SD) 0.68 (0.82)           | -                                    | -                         |
|      |                        |                                                          | Benralizumab 2mg   | 65                            | Mean (SD) 0.75 (0.87)           | -0.07 (-0.55-0.26) <sup>9</sup>      | 0.822                     |
|      |                        |                                                          | Benralizumab 20mg  | 70                            | Mean (SD) 0.30 (0.55)           | 0.57 (0.33-0.72) <sup>9</sup>        | 0.015                     |
|      |                        |                                                          | Benralizumab 100mg | 97                            | Mean (SD) 0.38 (0.62)           | 0.43 (0.18-0.60) <sup>9</sup>        | 0.049                     |
|      |                        | Baseline blood<br>eosinophil count<br><300 cells per uL  | Placebo            | 139                           | Mean (SD) 0.49 (0.70)           | -                                    | -                         |
|      |                        |                                                          | Benralizumab 2mg   | 16                            | Mean (SD) 0.21 (0.46)           | 0.57 (NR)                            | 0.271                     |
|      |                        |                                                          | Benralizumab 20mg  | 11                            | Mean (SD) 0.82 (0.91)           | -0.70 (NR)                           | 0.265                     |
|      |                        |                                                          | Benralizumab 100mg | 124                           | Mean (SD) 0.42 (0.65)           | 0.16 (-0.15-0.39) <sup>9</sup>       | 0.479                     |
| 20   | Jackson et<br>al. 2020 | Serum IgE<br>concentration<br>(kU/L) <62.0               | Placebo            | 75                            | 1.40 (1.00-1.96)                | -                                    | -                         |
|      |                        |                                                          | Benralizumab Q8W   | 73                            | 0.71 (0.46-1.09)                | -0.69 (-1.21 to -0.17)               | 0.51 (0.31-0.84)          |
|      |                        | Serum IgE<br>concentration<br>(kU/L) ≥62.0 to<br><176.2  | Placebo            | 112                           | 1.66 (1.26-2.18)                | -                                    | -                         |
|      |                        |                                                          | Benralizumab Q8W   | 109                           | 0.79 (0.56-1.10)                | -0.87 (-1.38 to -0.37)               | 0.47 (0.31-0.72)          |
|      |                        | Serum IgE<br>concentration<br>(kU/L) ≥176.2 to<br><453.4 | Placebo            | 125                           | 1.37 (1.07-1.76)                | -                                    | -                         |
|      |                        |                                                          | Benralizumab Q8W   | 106                           | 0.71 (0.52-0.97)                | -0.67 (-1.06 to -0.27)               | 0.52 (0.35-0.76)          |
|      |                        | Serum IgE<br>concentration<br>(kU/L) >453.4              | Placebo            | 129                           | 1.22 (0.92-1.62)                | -                                    | -                         |
|      |                        |                                                          | Benralizumab Q8W   | 128                           | 0.68 (0.48-0.96)                | -0.54 (-0.93 to -0.15)               | 0.56 (0.37-0.84)          |
| 21   | Chipps et<br>al. 2020  | FAO+                                                     | Placebo            | 308                           | 1.32 (1.13-1.55)                | -                                    | -                         |
|      |                        |                                                          | Benralizumab Q8W   | 313                           | 0.74 (0.61-0.88)                | -0.59 (-0.83 to -0.34)               | 0.56 (0.44-0.71)          |
|      |                        | FAO-                                                     | Placebo            | 193                           | 0.86 (0.69-1.08)                | -                                    | -                         |
|      |                        |                                                          | Benralizumab Q8W   | 176                           | 0.50 (0.38-0.66)                | -0.36 (-0.60 to -0.12)               | 0.58 (0.41-0.83)          |
| 25   |                        | Winter                                                   | Benralizumab Q4W   | 505                           | 0.91 (0.75-1.11) <sup>10</sup>  | 0.63 (0.49-0.81) <sup>11</sup>       | <0.001                    |

<sup>10</sup> Marginal Annual Exacerbation Rate (95%CI)

<sup>11</sup> Rate Ratio (95%CI)

| List | Trial                  | Treatment arm                                          |                          | Subjects | Crude annual rate<br>(95% CI)  | Absolute<br>difference estimate | Relative<br>reduction vs.<br>placebo | p value<br>vs.<br>placebo |
|------|------------------------|--------------------------------------------------------|--------------------------|----------|--------------------------------|---------------------------------|--------------------------------------|---------------------------|
|      | DuBuske<br>et al. 2018 |                                                        | Benralizumab Q8W         | 495      | 0.87 (0.70-1.07) <sup>10</sup> |                                 | 0.60 (0.46-0.78) <sup>11</sup>       | <0.001                    |
|      |                        |                                                        | Placebo                  | 513      | 1.45 (1.23-1.70) <sup>10</sup> | -                               | -                                    | -                         |
|      |                        | Spring                                                 | Benralizumab Q4W         | 505      | 0.66 (0.53-0.84) <sup>10</sup> |                                 | 0.60 (0.44-0.81) <sup>11</sup>       | <0.001                    |
|      |                        |                                                        | Benralizumab Q8W         | 490      | 0.55 (0.42-0.72) <sup>10</sup> |                                 | 0.50 (0.36-0.69) <sup>11</sup>       | <0.001                    |
|      |                        |                                                        | Placebo                  | 504      | 1.11 (0.92-1.34) <sup>10</sup> | -                               | -                                    | -                         |
|      |                        | Summer                                                 | Benralizumab Q4W         | 508      | 0.56 (0.43-0.73) <sup>10</sup> |                                 | 0.54 (0.39-0.76) <sup>11</sup>       | <0.001                    |
|      |                        |                                                        | Benralizumab Q8W         | 487      | 0.57 (0.43-0.75) <sup>10</sup> |                                 | 0.55 (0.39-0.78) <sup>11</sup>       | <0.001                    |
|      |                        |                                                        | Placebo                  | 500      | 1.02 (0.83-1.27) <sup>10</sup> | -                               | -                                    | -                         |
|      |                        | Fall                                                   | Benralizumab Q4W         | 506      | 0.88 (0.71-1.08) <sup>10</sup> |                                 | 0.57 (0.44-0.74) <sup>11</sup>       | <0.001                    |
|      |                        |                                                        | Benralizumab Q8W         | 493      | 0.84 (0.67-1.04) <sup>10</sup> |                                 | 0.54 (0.42-0.71) <sup>11</sup>       | <0.001                    |
|      |                        |                                                        | Placebo                  | 510      | 1.54 (1.30-1.81) <sup>10</sup> | -                               | -                                    | -                         |
| 26   | Chipps et<br>al. 2018  | Met atopy and<br>IgE 30-700 kU/L<br>criteria           | Placebo                  | 179      | 1.25 (1.01-1.54)               | -                               | -                                    | -                         |
|      |                        |                                                        | Benralizumab 30mg<br>Q4W | 153      | 0.62 (0.47-0.81)               | -0.63 (-0.93 to 0.32)           | 0.50 (0.36 to 0.69)                  | <0.0001                   |
|      |                        |                                                        | Benralizumab 30mg<br>Q8W | 185      | 0.67 (0.52-0.86)               | -0.58 (-0.89 to -0.27)          | 0.54 (0.39 to 0.74)                  | 0.0002                    |
|      |                        | Did not meet<br>atopy and IgE 30-<br>700 kU/L criteria | Placebo                  | 336      | 1.07 (0.91-1.26)               |                                 |                                      |                           |
|      |                        |                                                        | Benralizumab 30mg<br>Q4W | 363      | 0.69 (0.58-0.82)               | -0.38 (-0.59 to -0.17)          | 0.64 (0.51 to 0.81)                  | 0.0002                    |
|      |                        |                                                        | Benralizumab 30mg<br>Q8W | 321      | 0.65 (0.54-0.78)               | -0.42 (-0.63 to -0.21)          | 0.61 (0.47 to 0.78)                  | <0.0001                   |
|      |                        | IgE high (≥150<br>kU/L)                                | Placebo                  | 304      | 1.09 (0.92-1.29)               |                                 |                                      |                           |
|      |                        |                                                        | Benralizumab 30mg<br>Q4W | 304      | 0.69 (0.58-0.84)               | -0.39 (-0.62 to 0.17)           | 0.64 (0.50 to 0.82)                  | 0.0004                    |

| List | Trial                  | Treatment arm                                                                                              |                          | Subjects         | Crude annual rate<br>(95% CI) | Absolute<br>difference estimate | Relative<br>reduction vs.<br>placebo | p value<br>vs.<br>placebo |
|------|------------------------|------------------------------------------------------------------------------------------------------------|--------------------------|------------------|-------------------------------|---------------------------------|--------------------------------------|---------------------------|
|      |                        |                                                                                                            | Benralizumab 30mg<br>Q8W | 297              | 0.63 (0.52-0.77)              | -0.46 (-0.68 to -0.24)          | 0.58 (0.45 to 0.75)                  | <0.0001                   |
|      |                        | IgE low (<150<br>kU/L)                                                                                     | Placebo                  | 206              | 1.21 (0.99-1.47)              |                                 |                                      |                           |
|      |                        |                                                                                                            | Benralizumab 30mg<br>Q4W | 207              | 0.65 (0.52-0.82)              | -0.56 (-0.84 to -0.27)          | 0.54 (0.40 to 0.73)                  | <0.0001                   |
|      |                        |                                                                                                            | Benralizumab 30mg<br>Q8W | 199              | 0.68 (0.54-0.87)              | -0.52 (-0.82 to -0.23)          | 0.57 (0.41 to 0.78)                  | 0.0002                    |
|      |                        | With atopy                                                                                                 | Placebo                  | 316              | 1.10 (0.94-1.30)              |                                 |                                      |                           |
|      |                        |                                                                                                            | Benralizumab 30mg<br>Q4W | 307              | 0.71 (0.59-0.85)              | -0.40 (-0.62 to -0.17)          | 0.64 (0.50 to 0.82)                  | 0.0004                    |
|      |                        |                                                                                                            | Benralizumab 30mg<br>Q8W | 318              | 0.66 (0.55-0.80)              | -0.44 (-0.66 to -0.22)          | 0.60 (0.47 to 0.77)                  | <0.0001                   |
|      |                        | Without atopy                                                                                              | Placebo                  | 193              | 1.15 (0.95-1.41)              |                                 |                                      |                           |
|      |                        |                                                                                                            | Benralizumab 30mg<br>Q4W | 201              | 0.60 (0.48-0.76)              | -0.55 (-0.82 to -0.28)          | 0.52 (0.39 to 0.71)                  | <0.0001                   |
|      |                        |                                                                                                            | Benralizumab 30mg<br>Q8W | 181              | 0.62 (0.49-0.79)              | -0.53 (-0.81 to -0.26)          | 0.54 (0.39 to 0.74)                  | 0.0002                    |
| 28   | Ohta et al.<br>2018    | [CALIMA Japan]<br>High-dosage ICS<br>plus LABA with<br>baseline blood<br>eosinophils ≥ 300<br>cells per uL | Placebo                  | 16               | 2.45 (1.23-4.89)              | -                               | -                                    | -                         |
|      |                        | Benralizumab 30mg<br>Q4W                                                                                   | 15                       | 0.83 (0.36-1.89) |                               | 0.34 (0.11 to 0.99)             |                                      |                           |
|      |                        | Benralizumab 30mg<br>Q8W                                                                                   | 15                       | 0.42 (0.15-1.18) |                               | 0.17 (0.05 to 0.60)             |                                      |                           |
| 29   | Goldman<br>et al. 2017 | [SIROCCO]<br>High-dosage ICS<br>plus LABA with<br>baseline blood                                           | Placebo                  | 306              | 1.50 (1.27-1.76)              | -                               | -                                    | -                         |
|      |                        | Benralizumab 30mg<br>Q8W                                                                                   | 325                      | 0.87 (0.72-1.05) | -0.63 (-0.91 to -0.35)        | 0.58 (0.46 to 0.74)             | <0.001                               |                           |

| List | Trial | Treatment arm                                                                                              | Subjects                 | Crude annual rate<br>(95% CI) | Absolute<br>difference estimate | Relative<br>reduction vs.<br>placebo | p value<br>vs.<br>placebo |
|------|-------|------------------------------------------------------------------------------------------------------------|--------------------------|-------------------------------|---------------------------------|--------------------------------------|---------------------------|
|      |       | eosinophils $\geq$ 150<br>cells per uL                                                                     |                          |                               |                                 |                                      |                           |
|      |       | [CALIMA] High-<br>dosage ICS plus<br>LABA with<br>baseline blood<br>eosinophils $\geq$ 150<br>cells per uL | Placebo                  | 315                           | 1.10 (0.94-1.28)                | -                                    | -                         |
|      |       |                                                                                                            | Benralizumab 30mg<br>Q8W | 300                           | 0.70 (0.58-0.85)                | -0.40 (-0.61 to -0.19)               | 0.64 (0.50 to 0.81)       |
|      |       | [SIROCCO] High-<br>dosage ICS plus LABA with<br>baseline blood<br>eosinophils $<$ 150<br>cells per uL      | Placebo                  | 74                            | 1.34 (1.00-1.79)                | -                                    | -                         |
|      |       |                                                                                                            | Benralizumab 30mg<br>Q8W | 48                            | 1.01 (0.66-1.55)                | -0.33 (-0.91 to 0.25)                | 0.76 (0.45 to 1.27)       |
|      |       | [CALIMA] High-<br>dosage ICS plus LABA with<br>baseline blood<br>eosinophils $<$ 150<br>cells per uL       | Placebo                  | 40                            | 1.55 (1.06-2.28)                | -                                    | -                         |
|      |       |                                                                                                            | Benralizumab 30mg<br>Q8W | 48                            | 1.01 (0.69-1.48)                | -0.54 (-1.23 to 0.14)                | 0.65 (0.39 to 1.09)       |

**Table S7. Summary of FEV<sub>1</sub>**

| List | Trial                   | Treatment arms                          | N                 | FEV1 before<br>bronchodilation<br>LS mean change | LS mean change<br>(number of<br>patients <sup>12</sup> ) | Difference<br>vs.<br>placebo | Difference<br>vs. placebo<br>(95% CI) | P-<br>value |
|------|-------------------------|-----------------------------------------|-------------------|--------------------------------------------------|----------------------------------------------------------|------------------------------|---------------------------------------|-------------|
| 1    | Menzies-Gow et al. 2021 | Placebo                                 | 531               | Mean (SD) 0.23 (0.02)                            | 531                                                      | -                            | -                                     | -           |
|      |                         | Tezepelumab                             | 528               | Mean (SD) 0.09 (0.02)                            | 528                                                      | 0.13                         | 0.08 to 0.18                          | P<0.001     |
| 4    | Busse et al. 2018       | $\geq$ 300 cells<br>per uL<br>(week 48) | Q4W/Q4W group     | 347                                              | -0.011 (0.323; -0.047-<br>0.025)                         | 308                          |                                       |             |
|      |                         |                                         | Placebo/Q4W group | 172                                              | 0.129 (0.449; 0.057-<br>0.200)                           | 150                          |                                       |             |
|      |                         |                                         | Total             | 519                                              | 0.035 (0.374; 0.001-<br>0.069)                           | 458                          |                                       |             |

<sup>12</sup> Number of patients with end of treatment data

| List | Trial | Treatment arms                                    | N                 | FEV1 before<br>bronchodilation<br>LS mean change | LS mean change<br>(number of<br>patients <sup>12</sup> ) | Difference<br>vs.<br>placebo | Difference<br>vs. placebo<br>(95% CI) | P-<br>value |
|------|-------|---------------------------------------------------|-------------------|--------------------------------------------------|----------------------------------------------------------|------------------------------|---------------------------------------|-------------|
|      |       |                                                   | Q8W/Q8W group     | 339                                              | 0.053 (0.345; 0.015-<br>0.092)                           | 310                          |                                       |             |
|      |       |                                                   | Placebo/Q8W group | 188                                              | 0.125 (0.402; 0.065-<br>0.186)                           | 169                          |                                       |             |
|      |       |                                                   | Total             | 527                                              | 0.079 (0.367; 0.046-<br>0.112)                           | 469                          |                                       |             |
|      |       | < 300 cells<br>per uL<br>(week 48)                | Q4W/Q4W group     | 171                                              | 0.016 (0.332; -0.037-<br>0.069)                          | 150                          |                                       |             |
|      |       |                                                   | Placebo/Q4W group | 93                                               | 0.017 (0.514; -0.094-<br>0.127)                          | 83                           |                                       |             |
|      |       |                                                   | Total             | 264                                              | 0.016 (0.405; -0.036-<br>0.068)                          | 233                          |                                       |             |
|      |       |                                                   | Q8W/Q8W group     | 173                                              | 0.001 (0.304; -0.046-<br>0.048)                          | 162                          |                                       |             |
|      |       |                                                   | Placebo/Q8W group | 93                                               | 0.073 (0.407; -0.016-<br>0.162)                          | 80                           |                                       |             |
|      |       |                                                   | Total             | 266                                              | 0.025 (0.342; -0.018-<br>0.068)                          | 242                          |                                       |             |
|      |       | ≥ 300 cells<br>per uL<br>(week 56 <sup>13</sup> ) | Q4W/Q4W group     | 347                                              | -0.006 (0.295; -0.039-<br>0.028)                         | 297                          |                                       |             |
|      |       |                                                   | Placebo/Q4W group | 172                                              | 0.131 (0.422; 0.061-<br>0.200)                           | 142                          |                                       |             |
|      |       |                                                   | Total             | 519                                              | 0.038 (0.346; 0.006-<br>0.071)                           | 439                          |                                       |             |
|      |       |                                                   | Q8W/Q8W group     | 339                                              | 0.019 (0.317; -0.018-<br>0.055)                          | 291                          |                                       |             |
|      |       |                                                   | Placebo/Q8W group | 188                                              | 0.081 (0.419; 0.014-<br>0.148)                           | 151                          |                                       |             |
|      |       |                                                   | Total             | 527                                              | 0.040 (0.356; 0.007-<br>0.073)                           | 442                          |                                       |             |
|      |       | < 300 cells<br>per uL<br>(week 56 <sup>13</sup> ) | Q4W/Q4W group     | 171                                              | -0.021 (0.376; -0.081-<br>0.040)                         | 147                          |                                       |             |
|      |       |                                                   | Placebo/Q4W group | 93                                               | -0.011 (0.280; -0.073-<br>0.051)                         | 79                           |                                       |             |

<sup>13</sup> Week 56 data are for adults only

| List | Trial                   | Treatment arms                                                             | N                          | FEV1 before<br>bronchodilation<br>LS mean change | LS mean change<br>(number of<br>patients <sup>12</sup> ) | Difference<br>vs.<br>placebo | Difference<br>vs. placebo<br>(95% CI) | P-<br>value              |
|------|-------------------------|----------------------------------------------------------------------------|----------------------------|--------------------------------------------------|----------------------------------------------------------|------------------------------|---------------------------------------|--------------------------|
|      |                         |                                                                            | Total                      | 264                                              | -0.017 (0.345; -0.062-<br>0.028)                         | 226                          |                                       |                          |
|      |                         |                                                                            | Q8W/Q8W group              | 173                                              | -0.015 (0.293; -0.062-<br>0.032)                         | 14                           |                                       |                          |
|      |                         |                                                                            | Placebo/Q8W group          | 93                                               | 0.030 (0.350; -0.053-<br>0.112)                          | 69                           |                                       |                          |
|      |                         |                                                                            | Total                      | 266                                              | -0.001 (0.312; -0.042-<br>0.040)                         | 218                          |                                       |                          |
| 5    | Corren et<br>al. 2017   | Total                                                                      | Placebo                    | 131                                              | -0.06                                                    | 131                          | -                                     |                          |
|      |                         |                                                                            | Low-dose Tezepelumab       | 130                                              | 0.07                                                     | 130                          | 0.12                                  | 0.02 to 0.22<br>0.015    |
|      |                         |                                                                            | Medium-Dose<br>Tezepelumab | 121                                              | 0.08                                                     | 121                          | 0.13                                  | 0.03 to 0.23<br>0.009    |
|      |                         |                                                                            | High-dose<br>Tezepelumab   | 116                                              | 0.1                                                      | 116                          | 0.15                                  | 0.05 to 0.25<br>0.002    |
|      |                         | ≥ 250<br>Eosinophils<br>per uL                                             | Placebo                    | 76                                               | -0.05                                                    | 76                           | -                                     | -                        |
|      |                         |                                                                            | Tezepelumab 70mg<br>q4w    | 77                                               | 0.12                                                     | 77                           | 0.16                                  | 0.03 to 0.29<br>0.014    |
|      |                         |                                                                            | Tezepelumab 210mg<br>q4w   | 66                                               | 0.13                                                     | 66                           | 0.17                                  | 0.04 to 0.3<br>0.013     |
|      |                         |                                                                            | Tezepelumab 280mg<br>q2w   | 63                                               | 0.16                                                     | 63                           | 0.21                                  | 0.07 to 0.34<br>0.003    |
|      |                         | < 250<br>Eosinophils<br>per uL                                             | Placebo                    | 55                                               | -0.07                                                    | 55                           | -                                     | -                        |
|      |                         |                                                                            | Tezepelumab 70mg<br>q4w    | 53                                               | -0.03                                                    | 53                           | 0.04                                  | -0.11 to 0.19<br>0.580   |
|      |                         |                                                                            | Tezepelumab 210mg<br>q4w   | 55                                               | 0.01                                                     | 55                           | 0.08                                  | -0.07 to 0.23<br>0.289   |
|      |                         |                                                                            | Tezepelumab 280mg<br>q2w   | 53                                               | 0.01                                                     | 53                           | 0.08                                  | -0.07 to 0.23<br>0.275   |
| 7    | Bleecker<br>et al. 2016 | High-dosage<br>ICS plus<br>LABA with<br>baseline<br>blood<br>eosinophils ≥ | Placebo                    | 261                                              | 0.239 <sup>14</sup>                                      | 233                          | -                                     | -                        |
|      |                         |                                                                            | Benralizumab 30mg<br>Q4W   | 271                                              | 0.345 <sup>14</sup>                                      | 236                          | 0.106                                 | 0.016 to 0.196<br>0.0215 |
|      |                         |                                                                            | Benralizumab 30mg<br>Q8W   | 264                                              | 0.398 <sup>14</sup>                                      | 235                          | 0.159                                 | 0.068 to 0.249<br>0.0006 |

<sup>14</sup> Estimates calculated using a mixed-effects model for repeated measures analysis, with adjustment for treatment, baseline value, region, oral corticosteroid use at time of randomization, visit, and visit\*treatment



| List | Trial                     | Treatment arms                                                                                    | N                        | FEV1 before<br>bronchodilation<br>LS mean change | LS mean change<br>(number of<br>patients <sup>12</sup> ) | Difference<br>vs.<br>placebo | Difference<br>vs. placebo<br>(95% CI) | P-<br>value               |        |
|------|---------------------------|---------------------------------------------------------------------------------------------------|--------------------------|--------------------------------------------------|----------------------------------------------------------|------------------------------|---------------------------------------|---------------------------|--------|
|      |                           | 300 cells per<br>uL                                                                               |                          |                                                  |                                                          |                              |                                       |                           |        |
|      |                           | High-dosage<br>ICS plus<br>LABA with<br>baseline<br>blood<br>eosinophils <<br>300 cells per<br>uL | Placebo                  | 138                                              | 0.145 <sup>14</sup>                                      | 125                          | -                                     | -                         | -      |
|      |                           |                                                                                                   | Benralizumab 30mg<br>Q4W | 120                                              | 0.120 <sup>14</sup>                                      | 105                          | -0.025                                | -0.134 to<br>0.083        | 0.6438 |
|      |                           |                                                                                                   | Benralizumab 30mg<br>Q8W | 129                                              | 0.248 <sup>14</sup>                                      | 119                          | 0.102                                 | 0.003 to 0.208            | 0.568  |
| 8    | FitzGerald et al.<br>2016 | High-dosage<br>ICS plus<br>LABA with<br>baseline<br>blood<br>eosinophils ≥<br>300 cells per<br>uL | Placebo                  | 244                                              | 0.215 <sup>14</sup>                                      | 221                          | -                                     | -                         | -      |
|      |                           |                                                                                                   | Benralizumab 30mg<br>Q4W | 238                                              | 0.340 <sup>14</sup>                                      | 216                          | 0.125                                 | 0.037 to 0.213            | 0.0054 |
|      |                           | Benralizumab 30mg<br>Q8W                                                                          | 238                      | 0.330 <sup>14</sup>                              | 211                                                      | 0.116                        | 0.028 to 0.204                        | 0.0102                    |        |
|      |                           | High-dosage<br>ICS plus<br>LABA with<br>baseline<br>blood<br>eosinophils <<br>300 cells per<br>uL | Placebo                  | 116                                              | 0.156 <sup>14</sup>                                      | 99                           | -                                     | -                         | -      |
|      |                           |                                                                                                   | Benralizumab 30mg<br>Q4W | 114                                              | 0.219 <sup>14</sup>                                      | 101                          | 0.064                                 | -0.049 to<br>0.176        | 0.2676 |
|      |                           |                                                                                                   | Benralizumab 30mg<br>Q8W | 121                                              | 0.140 <sup>14</sup>                                      | 98                           | -0.015                                | -0.127 to<br>0.096        | 0.7863 |
| 10   | Castro et al. 2014        | Eosinophilic                                                                                      | Placebo                  | 51                                               | Mean (SD) 0.04 (0.46)                                    | 51                           | -                                     | -                         | -      |
|      |                           |                                                                                                   | Benralizumab 2mg         | 51                                               | Mean (SD) 0.16 (0.47)                                    | 51                           | 0.13                                  | 0.02 to 0.24 <sup>9</sup> | 0.14   |
|      |                           |                                                                                                   | Benralizumab 20mg        | 58                                               | Mean (SD) 0.19 (0.52)                                    | 58                           | 0.17                                  | 0.05 to 0.29 <sup>9</sup> | 0.069  |
|      |                           |                                                                                                   | Benralizumab 100mg       | 59                                               | Mean (SD) 0.17 (0.39)                                    | 59                           | 0.15                                  | 0.05 to 0.25 <sup>9</sup> | 0.063  |
|      |                           | Non-<br>eosinophilic                                                                              | Placebo                  | 99                                               | Mean (SD) -0.01 (0.30)                                   | 99                           | -                                     | -                         | -      |
|      |                           |                                                                                                   | Benralizumab 100mg       | 101                                              | Mean (SD) 0.06 (0.33)                                    | 101                          | 0.06                                  | 0.01 to 0.12 <sup>9</sup> | 0.155  |
|      |                           | Baseline<br>blood<br>eosinophil<br>count ≥300<br>cells per uL                                     | Placebo                  | 53                                               | Mean (SD) -0.01                                          | 53                           | -                                     | -                         | -      |
|      |                           |                                                                                                   | Benralizumab 2mg         | 41                                               | Mean (SD) 0.16                                           | 41                           | 0.17                                  | 0.05 to 0.29 <sup>9</sup> | 0.079  |
|      |                           |                                                                                                   | Benralizumab 20mg        | 48                                               | Mean (SD) 0.2                                            | 48                           | 0.23                                  | 0.11 to 0.36 <sup>9</sup> | 0.019  |
|      |                           |                                                                                                   | Benralizumab 100mg       | 68                                               | Mean (SD) 0.19                                           | 68                           | 0.2                                   | 0.10 to 0.29 <sup>9</sup> | 0.01   |

| List | Trial                 | Treatment arms                                                | N                        | FEV1 before<br>bronchodilation<br>LS mean change | LS mean change<br>(number of<br>patients <sup>12</sup> ) | Difference<br>vs.<br>placebo | Difference<br>vs. placebo<br>(95% CI) | P-<br>value                |
|------|-----------------------|---------------------------------------------------------------|--------------------------|--------------------------------------------------|----------------------------------------------------------|------------------------------|---------------------------------------|----------------------------|
|      |                       | Baseline<br>blood<br>eosinophil<br>count <300<br>cells per uL | Placebo                  | 97                                               | Mean (SD) 0.02                                           | 97                           | -                                     | -                          |
|      |                       |                                                               | Benralizumab 2mg         | 10                                               | Mean (SD) 0.17                                           | 10                           | -                                     | -                          |
|      |                       |                                                               | Benralizumab 20mg        | 10                                               | Mean (SD) 0.11                                           | 10                           | -                                     | -                          |
|      |                       |                                                               | Benralizumab 100mg       | 91                                               | Mean (SD) 0.04                                           | 91                           | 0.02                                  | -0.04 to 0.08 <sup>9</sup> |
| 21   | Chipps et<br>al. 2020 | FAO <sup>15</sup>                                             | Placebo                  | 304                                              | 0.184                                                    | 277                          | -                                     | -                          |
|      |                       |                                                               | Benralizumab q8w         | 312                                              | 0.343                                                    | 284                          | 0.159                                 | 0.082 to 0.236             |
|      |                       | FAO-                                                          | Placebo                  | 190                                              | 0.293                                                    | 168                          | -                                     | -                          |
|      |                       |                                                               | Benralizumab q8w         | 175                                              | 0.396                                                    | 148                          | 0.103                                 | -0.008 to<br>0.215         |
| 26   | Chipps et<br>al. 2018 | Met atopy<br>and IgE 30-<br>700 kU/L<br>criteria              | Placebo                  | 178                                              | 0.238                                                    | 155                          | -                                     | -                          |
|      |                       |                                                               | Benralizumab 30mg<br>Q4W | 149                                              | 0.367                                                    | 135                          | 0.129                                 | 0.017 to 0.241             |
|      |                       |                                                               | Benralizumab 30mg<br>Q8W | 184                                              | 0.363                                                    | 161                          | 0.125                                 | 0.018 to 0.232             |
|      |                       | Did not meet<br>atopy and<br>IgE 30-700<br>kU/L criteria      | Placebo                  | 327                                              | 0.217                                                    | 299                          | -                                     | -                          |
|      |                       |                                                               | Benralizumab 30mg<br>Q4W | 360                                              | 0.330                                                    | 317                          | 0.114                                 | 0.040 to 0.187             |
|      |                       |                                                               | Benralizumab 30mg<br>Q8W | 318                                              | 0.369                                                    | 285                          | 0.152                                 | 0.076 to 0.228             |
|      |                       | IgE high<br>(≥150 kU/L)                                       | Placebo                  | 301                                              | 0.247                                                    | 268                          | -                                     | -                          |
|      |                       |                                                               | Benralizumab 30mg<br>Q4W | 299                                              | 0.367                                                    | 267                          | 0.120                                 | 0.038 to 0.202             |
|      |                       |                                                               | Benralizumab 30mg<br>Q8W | 296                                              | 0.370                                                    | 264                          | 0.123                                 | 0.041 to 0.205             |
|      |                       | IgE low<br>(<150 kU/L)                                        | Placebo                  | 200                                              | 0.200                                                    | 182                          | -                                     | -                          |
|      |                       |                                                               | Benralizumab 30mg<br>Q4W | 205                                              | 0.297                                                    | 181                          | 0.098                                 | 0.004 to 0.191             |
|      |                       |                                                               | Benralizumab 30mg<br>Q8W | 197                                              | 0.338                                                    | 174                          | 0.138                                 | 0.044 to 0.233             |
|      |                       | With atopy                                                    | Placebo                  | 314                                              | 0.236                                                    | 276                          | -                                     | -                          |
|      |                       |                                                               | Benralizumab 30mg<br>Q4W | 303                                              | 0.339                                                    | 269                          | 0.103                                 | 0.022 to 0.184             |

<sup>15</sup> FAO+ and FAO- are defined as <70% or ≥70% of a ratio (\*100) of postbronchodilator FEV<sub>1</sub> to FVC, respectively, at baseline, estimates calculated via a repeated measures model, with adjustment for study code, treatment, baseline value, region, OCS use at time of randomization, visit, and vist\*treatment

| List | Trial                  | Treatment arms                                                                                                          | N                        | FEV1 before<br>bronchodilation<br>LS mean change | LS mean change<br>(number of<br>patients <sup>12</sup> ) | Difference<br>vs.<br>placebo | Difference<br>vs. placebo<br>(95% CI) | P-<br>value    |        |
|------|------------------------|-------------------------------------------------------------------------------------------------------------------------|--------------------------|--------------------------------------------------|----------------------------------------------------------|------------------------------|---------------------------------------|----------------|--------|
|      |                        |                                                                                                                         | Benralizumab 30mg<br>Q8W | 316                                              | 0.349                                                    | 279                          | 0.114                                 | 0.033 to 0.194 | 0.0056 |
|      |                        | Without<br>atopy                                                                                                        | Placebo                  | 186                                              | 0.201                                                    | 173                          | -                                     | -              | -      |
|      |                        |                                                                                                                         | Benralizumab 30mg<br>Q4W | 198                                              | 0.348                                                    | 176                          | 0.148                                 | 0.053 to 0.242 | 0.0021 |
|      |                        |                                                                                                                         | Benralizumab 30mg<br>Q8W | 180                                              | 0.382                                                    | 162                          | 0.181                                 | 0.185 to 0.278 | 0.0002 |
| 28   | Ohta et al.<br>2018    | [CALIMA<br>Japan] High-<br>dosage ICS<br>plus LABA<br>with<br>baseline<br>blood<br>eosinophils ≥<br>300 cells per<br>uL | Placebo                  | 16                                               |                                                          |                              | -                                     | -              | -      |
|      |                        | Benralizumab 30mg<br>Q4W                                                                                                | 15                       |                                                  | 15                                                       | 0.334                        | 0.020 to 0.647                        |                |        |
|      |                        | Benralizumab 30mg<br>Q8W                                                                                                | 15                       |                                                  |                                                          | 0.198                        | -0.118 to<br>0.514                    |                |        |
| 29   | Goldman<br>et al. 2017 | [SIROCCO]<br>High-dosage<br>ICS plus<br>LABA with<br>baseline<br>blood<br>eosinophils ≥<br>150 cells per<br>uL          | Placebo                  | 300                                              | 0.16                                                     | 267                          | -                                     | -              | -      |
|      |                        | Benralizumab 30mg<br>Q8W                                                                                                | 323                      | 0.323                                            | 290                                                      | 0.163                        | 0.087 to 0.239                        | <0.001         |        |
|      |                        | [CALIMA]<br>High-dosage<br>ICS plus<br>LABA with<br>baseline<br>blood<br>eosinophils ≥<br>150 cells per<br>uL           | Placebo                  | 308                                              | 0.169                                                    | 282                          | -                                     | -              | -      |
|      |                        | Benralizumab 30mg<br>Q8W                                                                                                | 298                      | 0.286                                            | 258                                                      | 0.116                        | 0.041 to 0.191                        | 0.002          |        |
|      |                        | [SIROCCO]<br>High-dosage<br>ICS plus                                                                                    | Placebo                  | 72                                               | 0.125                                                    | 64                           | -                                     | -              | -      |
|      |                        | Benralizumab 30mg<br>Q8W                                                                                                | 46                       | 0.265                                            | 41                                                       | 0.140                        | -0.045 to<br>0.325                    | 0.136          |        |



| List | Trial                  | Treatment arms                                                               | N                                                                            | Total Asthma symptom score LS mean change | LS mean change (number of patients) | Difference vs. placebo | Difference vs. placebo (95% CI) | P-value        |        |
|------|------------------------|------------------------------------------------------------------------------|------------------------------------------------------------------------------|-------------------------------------------|-------------------------------------|------------------------|---------------------------------|----------------|--------|
|      |                        | baseline blood eosinophils < 300 cells per uL                                | Benralizumab 30mg Q8W                                                        | 127                                       | -1.06 <sup>14</sup>                 | 91                     | -0.29                           | -0.57 to -0.01 | 0.0431 |
| 8    | FitzGerald et al. 2016 | High-dosage ICS plus LABA with baseline blood eosinophils ≥ 300 cells per uL | Placebo                                                                      | 247                                       | -1.16 <sup>16</sup>                 | 187                    | -                               | -              | -      |
|      |                        |                                                                              | Benralizumab 30mg Q4W                                                        | 241                                       | -1.28 <sup>16</sup>                 | 184                    | -0.12                           | -0.32 to 0.07  | 0.2241 |
|      |                        | Benralizumab 30mg Q8W                                                        | 237                                                                          | -1.4 <sup>16</sup>                        | 185                                 | -0.23                  | -0.43 to -0.04                  | 0.0186         |        |
|      |                        |                                                                              | High-dosage ICS plus LABA with baseline blood eosinophils < 300 cells per uL | Placebo                                   | 122                                 | -0.95 <sup>16</sup>    | 89                              | -              | -      |
|      |                        | Benralizumab 30mg Q4W                                                        |                                                                              | 115                                       | -1.11 <sup>16</sup>                 | 88                     | -0.16                           | -0.44 to 0.13  | 0.2868 |
|      |                        | Benralizumab 30mg Q8W                                                        |                                                                              | 124                                       | -0.95 <sup>16</sup>                 | 85                     | -0.01                           | -0.28 to 0.29  | 0.9663 |
| 21   | Chipps et al. 2020     | FAO+                                                                         | Placebo                                                                      | 308                                       | -1.05                               | 230                    | -                               | -              | -      |
|      |                        |                                                                              | Benralizumab q8w                                                             | 311                                       | -1.34                               | 250                    | -0.13                           | -0.45 to -0.14 | 0.0002 |
|      |                        | FAO-                                                                         | Placebo                                                                      | 192                                       | -1.26                               | 129                    | -                               | -              | -      |
|      |                        |                                                                              | Benralizumab q8w                                                             | 172                                       | -1.33                               | 102                    | -0.08                           | -0.30 to 0.14  | 0.4941 |
| 28   | Ohta et al. 2018       | [CALIMA Japan] High-dosage ICS plus LABA with baseline                       | Placebo                                                                      |                                           |                                     |                        | -                               | -              | -      |
|      |                        | Benralizumab 30mg Q4W                                                        | 15                                                                           |                                           |                                     | 0.17                   | -0.82 to 0.48                   |                |        |
|      |                        | Benralizumab 30mg Q8W                                                        | 15                                                                           |                                           |                                     | 0.24                   | -0.87 to 0.40                   |                |        |

<sup>16</sup> Key secondary endpoint; composite of daytime and night-time symptoms scored 0-6 overall (a decrease in score indicates improvement)

| List | Trial               | Treatment arms                                                                         | N                     | Total Asthma symptom score<br>LS mean change | LS mean change (number of patients) | Difference vs. placebo | Difference vs. placebo (95% CI) | P-value        |       |
|------|---------------------|----------------------------------------------------------------------------------------|-----------------------|----------------------------------------------|-------------------------------------|------------------------|---------------------------------|----------------|-------|
|      |                     | blood eosinophils ≥ 300 cells per uL                                                   |                       |                                              |                                     |                        |                                 |                |       |
| 29   | Goldman et al. 2017 | [SIROCCO] High-dosage ICS plus LABA with baseline blood eosinophils ≥ 150 cells per uL | Placebo               | 306                                          | -0.95                               | 213                    | -                               | -              | -     |
|      |                     |                                                                                        | Benralizumab 30mg Q8W | 320                                          | -1.18                               | 221                    | -0.23                           | -0.41 to -0.06 | 0.009 |
|      |                     | [CALIMA] High-dosage ICS plus LABA with baseline blood eosinophils ≥ 150 cells per uL  | Placebo               | 314                                          | -1.08                               | 242                    | -                               | -              | -     |
|      |                     |                                                                                        | Benralizumab 30mg Q8W | 298                                          | -1.24                               | 227                    | -0.16                           | -0.33 to 0.01  | 0.073 |
|      |                     | [SIROCCO] High-dosage ICS plus LABA with baseline blood eosinophils < 150 cells per uL | Placebo               | 73                                           | -0.8                                | 50                     | -                               | -              | -     |
|      |                     |                                                                                        | Benralizumab 30mg Q8W | 47                                           | -1.2                                | 34                     | -0.40                           | -0.78 to -0.03 | 0.035 |
|      |                     | [CALIMA] High-dosage ICS plus LABA with                                                | Placebo               | 40                                           | -0.84                               | 29                     | -                               | -              | -     |
|      |                     |                                                                                        | Benralizumab 30mg Q8W | 48                                           | -0.79                               | 37                     | 0.04                            | -0.37 to 0.45  | 0.842 |

| List | Trial | Treatment arms                                | N | Total Asthma symptom score LS mean change | LS mean change (number of patients) | Difference vs. placebo | Difference vs. placebo (95% CI) | P-value |
|------|-------|-----------------------------------------------|---|-------------------------------------------|-------------------------------------|------------------------|---------------------------------|---------|
|      |       | baseline blood eosinophils < 150 cells per uL |   |                                           |                                     |                        |                                 |         |

**Table S9. Summary of ACQ-6 score, and AQLQ(S)+12 score**

| List | Trial              | Treatment arm                | N                 | ACQ-6 score                            |                          |         | N   | AQLQ (S) +12 score                     |                        |         |
|------|--------------------|------------------------------|-------------------|----------------------------------------|--------------------------|---------|-----|----------------------------------------|------------------------|---------|
|      |                    |                              |                   | Least-square mean change from baseline | Difference vs. placebo   | P-value |     | Least-square mean change from baseline | Difference vs. placebo | P-value |
| 1    | Menzies-Gow et al. | Placebo                      | 528               | Mean (SD) - 1.55(0.55)                 | -                        | -       | 254 | Mean (SD) 3.9(1.0)                     | -                      | -       |
|      |                    | Tezepelumab                  | 531               | Mean (SD) - 1.22(0.05)                 | -0.33 (-0.46 to 0.20)    | <0.001  | 261 | Mean (SD) 3.9(1.0)                     | 0.34 (0.20 to 0.47)    | <0.001  |
| 4    | Busse et al. 2018  | ≥ 300 cells per uL (week 48) | Q4W/Q4W group     | 320                                    | 0.01 (0.89; -0.09-0.10)  |         | 317 | 0.00 (0.90; -0.10-0.10)                |                        |         |
|      |                    |                              | Placebo/Q4W group | 158                                    | -0.27 (0.94; -0.42-0.13) |         | 157 | 0.19 (0.95; 0.04-0.34)                 |                        |         |
|      |                    |                              | Total             | 478                                    | -0.09 (0.92; -0.17-0.00) |         | 474 | 0.06 (0.92; -0.02-0.15)                |                        |         |
|      |                    |                              | Q8W/Q8W group     | 316                                    | 0.00 (0.81; -0.09-0.09)  |         | 316 | 0.02 (0.89; -0.08-0.12)                |                        |         |
|      |                    |                              | Placebo/Q8W group | 173                                    | -0.23 (1.07; -0.39-0.07) |         | 171 | 0.26 (1.02; 0.10-0.41)                 |                        |         |
|      |                    |                              | Total             | 489                                    | -0.08 (0.92; -0.16-0.00) |         | 487 | 0.10 (0.95; 0.02-0.19)                 |                        |         |
|      |                    | < 300 cells per uL (week 48) | Q4W/Q4W group     | 157                                    | -0.19 (0.91; -0.33-0.05) |         | 155 | 0.16 (0.84; 0.02-0.29)                 |                        |         |
|      |                    |                              | Placebo/Q4W group | 83                                     | -0.04 (0.87; -0.23-0.14) |         | 83  | 0.04 (1.00; -0.18-0.25)                |                        |         |

| List | Trial              | Treatment arm                | N                    | ACQ-6 score                            |                           |                       | P-value | N   | AQLQ (S) +12 score                     |                        |         |
|------|--------------------|------------------------------|----------------------|----------------------------------------|---------------------------|-----------------------|---------|-----|----------------------------------------|------------------------|---------|
|      |                    |                              |                      | Least-square mean change from baseline | Difference vs. placebo    |                       |         |     | Least-square mean change from baseline | Difference vs. placebo | P-value |
| 5    | Corren et al. 2017 |                              | Total                | 240                                    | -0.14 (0.90; -0.25-0.03)  |                       |         | 238 | 0.12 (0.90; 0.00-0.23)                 |                        |         |
|      |                    |                              | Q8W/Q8W group        | 164                                    | -0.07 (0.79; -0.19-0.05)  |                       |         | 164 | 0.14 (0.85; 0.01-0.27)                 |                        |         |
|      |                    |                              | Placebo/Q8W group    | 85                                     | -0.29 (0.98; -0.50-0.08)  |                       |         | 85  | 0.08 (0.96; -0.12-0.29)                |                        |         |
|      |                    |                              | Total                | 249                                    | -0.14 (0.86; -0.25-0.04)  |                       |         | 249 | 0.12 (0.89; 0.01-0.23)                 |                        |         |
|      |                    | ≥ 300 cells per uL (week 56) | Q4W/Q4W group        | 299                                    | -0.04 (0.83; -0.14-0.05)  |                       |         | 297 | 0.02 (0.80; -0.07-0.11)                |                        |         |
|      |                    |                              | Placebo/Q4W group    | 146                                    | -0.20 (1.04; -0.37-0.03)  |                       |         | 146 | 0.21 (0.98; 0.05-0.37)                 |                        |         |
|      |                    |                              | Total                | 445                                    | -0.09 (0.91; -0.18--0.01) |                       |         | 443 | 0.08 (0.87; 0.00-0.16)                 |                        |         |
|      |                    |                              | Q8W/Q8W group        | 297                                    | -0.06 (0.82; -0.15-0.03)  |                       |         | 295 | 0.08 (0.91; -0.02-0.19)                |                        |         |
|      |                    |                              | Placebo/Q8W group    | 153                                    | -0.25 (1.06; -0.41-0.08)  |                       |         | 153 | 0.26 (1.00; 0.10-0.42)                 |                        |         |
|      |                    |                              | Total                | 450                                    | -0.12 (0.91; -0.21--0.04) |                       |         | 448 | 0.15 (0.94; 0.06-0.23)                 |                        |         |
|      |                    | < 300 cells per uL (week 56) | Q4W/Q4W group        | 149                                    | -0.16 (0.90; -0.31--0.02) |                       |         | 148 | 0.11 (0.84; -0.02-0.25)                |                        |         |
|      |                    |                              | Placebo/Q4W group    | 79                                     | -0.12 (0.80; -0.29-0.06)  |                       |         | 79  | 0.03 (0.89; -0.16-0.23)                |                        |         |
|      |                    |                              | Total                | 228                                    | -0.15 (0.86; -0.26--0.03) |                       |         | 227 | 0.09 (0.85; -0.03-0.20)                |                        |         |
|      |                    |                              | Q8W/Q8W group        | 150                                    | -0.10 (0.83; -0.23 -0.04) |                       |         | 149 | 0.15 (0.90; 0.00 -0.29)                |                        |         |
|      |                    |                              | Placebo/Q8W group    | 67                                     | -0.09 (1.06; -0.35-0.16)  |                       |         | 67  | 0.02 (1.06; -0.23-0.28)                |                        |         |
|      |                    |                              | Total                | 217                                    | -0.10 (0.90; -0.22-0.02)  |                       |         | 216 | 0.11 (0.95; -0.02-0.24)                |                        |         |
|      |                    | Total                        | Placebo              | 53                                     | -0.91                     | -                     |         | 47  | 0.97                                   | -                      |         |
|      |                    |                              | Low-dose Tezepelumab | 52                                     | -1.17                     | -0.26 (-0.52 to 0.01) | 0.059   | 51  | 1.12                                   | 0.14 (-0.13 to 0.42)   | 0.309   |



| List | Trial                | Treatment arm                                                            | N                       | ACQ-6 score                            |                        |                           | P-value | N   | AQLQ (S) +12 score                     |                         |         |
|------|----------------------|--------------------------------------------------------------------------|-------------------------|----------------------------------------|------------------------|---------------------------|---------|-----|----------------------------------------|-------------------------|---------|
|      |                      |                                                                          |                         | Least-square mean change from baseline | Difference vs. placebo |                           |         |     | Least-square mean change from baseline | Difference vs. placebo  | P-value |
|      |                      |                                                                          | Medium-Dose Tezepelumab | 44                                     | -1.2                   | -0.29<br>(-0.56 to -0.01) | 0.039   | 41  | 1.17                                   | 0.2<br>(-0.09 to 0.48)  | 0.185   |
|      |                      |                                                                          | High-dose Tezepelumab   | 49                                     | -1.22                  | -0.31<br>(-0.58 to -0.04) | 0.024   | 48  | 1.32                                   | 0.34<br>(0.06 to 0.63)  | 0.017   |
|      |                      | ≥ 250 Eosinophils per uL                                                 | Placebo                 | 68                                     | -0.89                  | -                         |         | 62  | 0.90                                   | -                       |         |
|      |                      |                                                                          | Tezepelumab 70mg q4w    | 70                                     | -1.08                  | -0.19<br>(-0.49 to 0.11)  | 0.207   | 69  | 1.05                                   | 0.15<br>(-0.19 to 0.48) | 0.383   |
|      |                      |                                                                          | Tezepelumab 210mg q4w   | 60                                     | -1.37                  | -0.48<br>(-0.79 to -0.17) | 0.002   | 54  | 1.31                                   | 0.41<br>(0.06 to 0.76)  | 0.022   |
|      |                      |                                                                          | Tezepelumab 280mg q2w   | 55                                     | -1.15                  | -0.27<br>(-0.58 to -0.05) | 0.094   | 54  | 1.17                                   | 0.27<br>(-0.08 to 0.61) | 0.134   |
|      |                      | < 250 Eosinophils per uL                                                 | Placebo                 | 44                                     | -0.93                  | -                         |         | 43  | 0.93                                   | -                       |         |
|      |                      |                                                                          | Tezepelumab 70mg q4w    | 46                                     | -1.12                  | -0.19<br>(-0.53 to 0.14)  | 0.261   | 41  | 1.02                                   | 0.09<br>(-0.25 to 0.43) | 0.610   |
|      |                      |                                                                          | Tezepelumab 210mg q4w   | 50                                     | -1.15                  | -0.22<br>(-0.56 to -0.11) | 0.186   | 43  | 1.17                                   | 0.24<br>(-0.10 to 0.58) | 0.173   |
|      |                      |                                                                          | Tezepelumab 280mg q2w   | 47                                     | -1.29                  | -0.36<br>(-0.70 to -0.02) | 0.036   | 45  | 1.43                                   | 0.49<br>(0.15 to 0.83)  | 0.004   |
| 7    | Bleecker et al. 2016 | High-dosage ICS /LABA with baseline blood eosinophils ≥ 300 cells per uL | Placebo                 | 267                                    | -1.17                  | -                         | -       | 254 | 1.26                                   | -                       | -       |
|      |                      |                                                                          | Benralizumab 30mg q4w   | 274                                    | -1.32                  | -0.15<br>(-0.34 to 0.04)  | 0.1107  | 261 | 1.44                                   | 0.18<br>(-0.02 to 0.37) | 0.0811  |
|      |                      |                                                                          | Benralizumab 30mg q8w   | 263                                    | -1.46                  | -0.29<br>(-0.48 to -0.10) | 0.0028  | 252 | 1.56                                   | 0.3<br>(0.10 to 0.50)   | 0.0036  |

| List | Trial                  | Treatment arm                                                            | N                     | ACQ-6 score                            |                        |                                        | P-value | N   | AQLQ (S) +12 score                     |                         |         |
|------|------------------------|--------------------------------------------------------------------------|-----------------------|----------------------------------------|------------------------|----------------------------------------|---------|-----|----------------------------------------|-------------------------|---------|
|      |                        |                                                                          |                       | Least-square mean change from baseline | Difference vs. placebo |                                        |         |     | Least-square mean change from baseline | Difference vs. placebo  | P-value |
|      |                        | High-dosage ICS /LABA with baseline blood eosinophils < 300 cells per uL | Placebo               | 138                                    | -0.89                  | -                                      | -       | -   | -                                      | -                       | -       |
|      |                        |                                                                          | Benralizumab 30mg q4w | 124                                    | -0.89                  | 0<br>(-0.27 to 0.27)                   | 0.9903  | -   | -                                      | -                       | -       |
|      |                        |                                                                          | Benralizumab 30mg q8w | 130                                    | -1.11                  | -0.22<br>(-0.48 to -0.05)              | 0.1066  | -   | -                                      | -                       | -       |
| 8    | FitzGerald et al. 2016 | High-dosage ICS /LABA with baseline blood eosinophils ≥ 300 cells per uL | Placebo               | 247                                    | -1.19                  | -                                      | -       | 240 | 1.31                                   | -                       | -       |
|      |                        |                                                                          | Benralizumab 30mg Q4W | 241                                    | -1.38                  | -0.19<br>(-0.38 to -0.01)              | 0.0425  | 233 | 1.47                                   | 0.16<br>(-0.04 to 0.37) | 0.1194  |
|      |                        |                                                                          | Benralizumab 30mg Q8W | 239                                    | -1.44                  | -0.25<br>(-0.44 to -0.07)              | 0.0082  | 230 | 1.56                                   | 0.24<br>(0.04 to 0.45)  | 0.1194  |
|      |                        | High-dosage ICS/LABA with baseline blood eosinophils < 300 cells per uL  | Placebo               | 122                                    | -0.89                  | -                                      | -       | -   | -                                      | -                       | -       |
|      |                        |                                                                          | Benralizumab 30mg Q4W | 116                                    | -1.14                  | -0.24<br>(-0.51 to 0.03)               | 0.0776  | -   | -                                      | -                       | -       |
|      |                        |                                                                          | Benralizumab 30mg Q8W | 125                                    | -1.00                  | -0.10<br>(-0.37 to -0.16)              | 0.4488  | -   | -                                      | -                       | -       |
| 10   | Castro et al. 2014     | Eosinophilic                                                             | Placebo               | 34                                     | Mean (SD) -0.89(1.20)  | -                                      | -       | -   | -                                      | -                       | -       |
|      |                        |                                                                          | Benralizumab 2mg      | 42                                     | Mean (SD) -1.1(1.12)   | -0.36<br>(-0.65 to -0.06) <sup>9</sup> | 0.125   | -   | -                                      | -                       | -       |
|      |                        |                                                                          | Benralizumab 20mg     | 40                                     | Mean (SD) -1.25(1.22)  | -0.45<br>(-0.77 to -0.13) <sup>9</sup> | 0.074   | -   | -                                      | -                       | -       |

| List | Trial              | Treatment arm                                     | N                  | ACQ-6 score                            |                        |                                     | P-value | N   | AQLQ (S) +12 score                     |                                   |         |
|------|--------------------|---------------------------------------------------|--------------------|----------------------------------------|------------------------|-------------------------------------|---------|-----|----------------------------------------|-----------------------------------|---------|
|      |                    |                                                   |                    | Least-square mean change from baseline | Difference vs. placebo |                                     |         |     | Least-square mean change from baseline | Difference vs. placebo            | P-value |
|      |                    |                                                   | Benralizumab 100mg | 39                                     | Mean (SD) -1.12(1.29)  | -0.47 (-0.79 to -0.16) <sup>9</sup> | 0.057   | -   | -                                      | -                                 | -       |
|      |                    | Non-eosinophilic                                  | Placebo            | 64                                     | Mean (SD) -0.82(1.11)  | -                                   | -       | -   | -                                      | -                                 | -       |
|      |                    |                                                   | Benralizumab 100mg | 73                                     | Mean (SD) -1.13(1.05)  | -0.34 (-0.57 to -0.12) <sup>9</sup> | 0.053   | -   | -                                      | -                                 | -       |
|      |                    | Baseline blood eosinophil count ≥300 cells per uL | Placebo            | 38                                     | Mean (SD) -0.76 (1.20) | -                                   | -       | 37  | Mean (SD) 0.98 (1.44)                  | -                                 | -       |
|      |                    |                                                   | Benralizumab 2mg   | 35                                     | Mean (SD) -1.00 (1.14) | -0.34 (-0.65 to -0.03) <sup>9</sup> | 0.156   | 32  | Mean (SD) 1.08 (1.15)                  | 0.26 (-0.09 to 0.62) <sup>9</sup> | 0.335   |
|      |                    |                                                   | Benralizumab 20mg  | 35                                     | Mean (SD) -1.14 (1.19) | -0.44 (-0.75 to -0.12) <sup>9</sup> | 0.079   | 34  | Mean (SD) 1.41 (1.46)                  | 0.44 (0.06 to 0.81) <sup>9</sup>  | 0.134   |
|      |                    |                                                   | Benralizumab 100mg | 52                                     | Mean (SD) -1.26 (1.28) | -0.53 (-0.81 to -0.26) <sup>9</sup> | 0.015   | 47  | Mean (SD) 1.12 (1.23)                  | 0.15 (-0.18 to 0.49) <sup>9</sup> | 0.552   |
|      |                    | Baseline blood eosinophil count <300 cells per uL | Placebo            | 60                                     | Mean (SD) -0.89 (1.10) | -                                   | -       | 51  | Mean (SD) 0.95 (1.26)                  | -                                 | -       |
|      |                    |                                                   | Benralizumab 2mg   | 7                                      | Mean (SD) -1.62 (0.91) | -                                   | -       | 7   | Mean (SD) 2.11 (1.17)                  | -                                 | -       |
|      |                    |                                                   | Benralizumab 20mg  | 5                                      | Mean (SD) -2.00 (1.30) | -                                   | -       | 4   | Mean (SD) 1.80 (1.22)                  | -                                 | -       |
|      |                    |                                                   | Benralizumab 100mg | 60                                     | Mean (SD) -1.02 (0.98) | -0.22(-0.46 to -0.02) <sup>9</sup>  | 0.233   | 58  | Mean (SD) 1.13 (1.30)                  | 0.31(0 to 0.61) <sup>9</sup>      | 0.195   |
| 21   | Chipps et al. 2020 | FAO+                                              | Placebo            | 308                                    | -1.14                  | -                                   | -       | 299 | 1.21                                   | -                                 | -       |
|      |                    |                                                   | Benralizumab q8w   | 311                                    | -1.47                  | -0.33 (-0.49 to -0.17)              | <0.0001 | 300 | 1.55                                   | 0.33 (0.15 to 0.51)               | 0.0003  |
|      |                    | FAO-                                              | Placebo            | 192                                    | -1.23                  | -                                   | -       | 181 | 1.39                                   | -                                 | -       |
|      |                    |                                                   | Benralizumab q8w   | 175                                    | -1.41                  | -0.18 (-0.40 to 0.04)               | 0.1096  | 166 | 1.55                                   | 0.17 (-0.08 to 0.41)              | 0.1894  |

| List | Trial               | Treatment arm                                                                     | N                     | ACQ-6 score                            |                        |                           | P-value | N   | AQLQ (S) +12 score                     |                         |         |
|------|---------------------|-----------------------------------------------------------------------------------|-----------------------|----------------------------------------|------------------------|---------------------------|---------|-----|----------------------------------------|-------------------------|---------|
|      |                     |                                                                                   |                       | Least-square mean change from baseline | Difference vs. placebo |                           |         |     | Least-square mean change from baseline | Difference vs. placebo  | P-value |
| 26   | Chipps et al. 2018  | Met atopy and IgE 30-700 kU/L criteria                                            | Placebo               | 179                                    | -1.07                  | -                         | -       | 176 | 1.23                                   | -                       | -       |
|      |                     |                                                                                   | Benralizumab 30mg Q4W | 152                                    | -1.40                  | -0.33<br>(-0.55 to -0.11) | 0.0038  | 147 | 1.51                                   | 0.28<br>(0.04 to 0.52)  | 0.0207  |
|      |                     |                                                                                   | Benralizumab 30mg Q8W | 185                                    | -1.41                  | -0.34<br>(-0.55 to -0.13) | 0.0017  | 176 | 1.5                                    | 0.27<br>(0.04 to 0.50)  | 0.0193  |
|      |                     | Did not meet atopy and IgE 30-700 kU/L criteria                                   | Placebo               | 335                                    | -1.22                  | -                         | -       | 318 | 1.32                                   | -                       | -       |
|      |                     |                                                                                   | Benralizumab 30mg Q4W | 363                                    | -1.34                  | -0.12<br>(-0.28 to 0.03)  | 0.1111  | 347 | 1.43                                   | 0.11<br>(-0.06 to 0.27) | 0.2057  |
|      |                     |                                                                                   | Benralizumab 30mg Q8W | 317                                    | -1.47                  | -0.26<br>(-0.41 to -0.10) | 0.0016  | 306 | 1.59                                   | 0.27<br>(0.10 to 0.44)  | 0.0022  |
| 29   | Goldman et al. 2017 | [SIROCCO] High-dosage ICS/LABA with baseline blood eosinophils ≥ 150 cells per uL | Placebo               | 305                                    | -1.13                  | -                         | -       | 294 | 1.18                                   | -                       | -       |
|      |                     |                                                                                   | Benralizumab 30mg Q8W | 321                                    | -1.27                  | -0.15<br>(-0.31 to 0.02)  | 0.084   | 307 | 1.37                                   | 0.19<br>(0.01 to 0.37)  | 0.0036  |
|      |                     | [CALIMA] High-dosage ICS/LABA with baseline blood eosinophils ≥ 150 cells per uL  | Placebo               | 314                                    | -1.08                  | -                         | -       | 305 | 1.19                                   | -                       | -       |
|      |                     |                                                                                   | Benralizumab 30mg Q8W | 300                                    | -1.3                   | -0.22<br>(-0.39 to -0.06) | 0.0008  | 292 | 1.39                                   | 0.2<br>(0.02 to 0.38)   | 0.029   |
|      |                     |                                                                                   | Placebo               | 73                                     | -0.62                  |                           |         | 70  | 0.77                                   |                         |         |

| List | Trial | Treatment arm                                                                     | N                     | ACQ-6 score                            |                        |                       | AQLQ (S) +12 score |                                        |                        |                       |       |
|------|-------|-----------------------------------------------------------------------------------|-----------------------|----------------------------------------|------------------------|-----------------------|--------------------|----------------------------------------|------------------------|-----------------------|-------|
|      |       |                                                                                   |                       | Least-square mean change from baseline | Difference vs. placebo | P-value               | N                  | Least-square mean change from baseline | Difference vs. placebo | P-value               |       |
|      |       | [SIROCCO] High-dosage ICS/LABA with baseline blood eosinophils < 150 cells per uL | Benralizumab 30mg Q8W | 47                                     | -1.32                  | -0.7 (-1.15 to -0.25) | 0.0003             | 46                                     | 1.24                   | 0.46 (-0.01 to 0.94)  | 0.056 |
|      |       | [CALIMA] High-dosage ICS/LABA with baseline blood eosinophils < 150 cells per uL  | Placebo               | 40                                     | -0.84                  | -                     | -                  | 39                                     | 0.98                   | -                     | -     |
|      |       |                                                                                   | Benralizumab 30mg Q8W | 48                                     | -0.91                  | -0.07 (-0.56 to 0.43) | 0.783              | 46                                     | 0.97                   | -0.01 (-0.48 to 0.47) | 0.972 |

**Table S10. Summary of ED visits/hospitalization**

| List                       | Trial              | Treatment arm |                  | Subjects | Rate estimate (95% CI)         | Absolute difference estimate | Rate ratio vs. placebo | p value vs. placebo |
|----------------------------|--------------------|---------------|------------------|----------|--------------------------------|------------------------------|------------------------|---------------------|
| ED Visits/ hospitalization |                    |               |                  |          |                                |                              |                        |                     |
| 11                         | Chipps et al. 2020 | FAO+          | Placebo          | 308      | 0.13 (0.09-0.18) <sup>17</sup> |                              |                        |                     |
|                            |                    |               | Benralizumab Q8W | 313      | 0.07 (0.05-0.11)               | -0.06 (-0.11 to -0.01)       | 0.55 (0.33-0.91)       | 0.0195              |
|                            |                    | FAO-          | Placebo          | 193      | 0.10 (0.06-0.16)               |                              |                        |                     |

<sup>17</sup> Any exacerbations resulting in ED visits or hospitalizations in the previous year (for annual exacerbation rate associated with ED visits or hospitalizations).

|           |                     |                                                                                        |                       |     |                  |                        |                  |        |
|-----------|---------------------|----------------------------------------------------------------------------------------|-----------------------|-----|------------------|------------------------|------------------|--------|
|           |                     |                                                                                        | Benralizumab Q8W      | 176 | 0.07 (0.04-0.13) | -0.03 (-0.09 to 0.03)  | 0.70 (0.33-1.48) | 0.3514 |
| 21        | Goldman et al. 2017 | [SIROCCO] High-dosage ICS plus LABA with baseline blood eosinophils ≥ 150 cells per uL | Placebo               | 306 | 0.03 (0.02-0.05) |                        |                  |        |
|           |                     |                                                                                        | Benralizumab 30mg Q8W | 325 | 0.03 (0.02-0.08) | -0.10 (-0.19 to -0.02) | 0.54 (0.32-0.90) | 0.018  |
|           |                     | [CALIMA] High-dosage ICS plus LABA with baseline blood eosinophils ≥ 150 cells per uL  | Placebo               | 315 | NC               |                        |                  |        |
|           |                     |                                                                                        | Benralizumab 30mg Q8W | 300 | NC               | NC                     | NC               | NC     |
|           |                     | [SIROCCO] High-dosage ICS plus LABA with baseline blood eosinophils < 150 cells per uL | Placebo               | 74  | 0.16 (0.09-0.30) |                        |                  |        |
|           |                     |                                                                                        | Benralizumab 30mg Q8W | 48  | 0.31 (0.15-0.64) | 0.15 (-0.10 to 0.40)   | 1.92 (0.72-5.14) | 0.192  |
|           |                     | [CALIMA] High-dosage ICS plus LABA with baseline blood eosinophils < 150 cells per uL  | Placebo               | 40  | NC               |                        |                  |        |
|           |                     |                                                                                        | Benralizumab 30mg Q8W | 48  | NC               | NC                     | NC               | NC     |
| ED Visits |                     |                                                                                        |                       |     |                  |                        |                  |        |
| 7         | Corren et al. 2020  | Placebo                                                                                |                       | 138 |                  |                        |                  |        |
|           |                     | Low-dose Tezepelumab                                                                   |                       | 138 |                  |                        | 0.44 (0.14-1.41) |        |
|           |                     | Medium-Dose Tezepelumab                                                                |                       | 137 |                  |                        | 0.16 (0.04-0.69) |        |
|           |                     | High-dose Tezepelumab                                                                  |                       | 137 |                  |                        | 0.63 (0.22-1.81) |        |
|           |                     | Overall tezepelumab                                                                    |                       | 412 |                  |                        | 0.40 (0.17-0.97) |        |
| 14        | Busse et al. 2018   | ≥ 300 cells per uL                                                                     | Q4W/Q4W group         | 347 | 0.03 (0.02-0.05) |                        |                  |        |
|           |                     |                                                                                        | Placebo/Q4W group     | 172 | 0.03 (0.02-0.08) |                        |                  |        |
|           |                     |                                                                                        | Total                 | 519 | 0.03 (0.02-0.05) |                        |                  |        |
|           |                     |                                                                                        | Q8W/Q8W group         | 339 | 0.04 (0.03-0.07) |                        |                  |        |

|    |                    |                         |                   |     |                  |  |                  |  |
|----|--------------------|-------------------------|-------------------|-----|------------------|--|------------------|--|
|    |                    |                         | Placebo/Q8W group | 188 | 0.06 (0.04-0.11) |  |                  |  |
|    |                    |                         | Total             | 527 | 0.05 (0.03-0.07) |  |                  |  |
|    |                    | < 300 cells per uL      | Q4W/Q4W group     | 171 | 0.03 (0.01-0.07) |  |                  |  |
|    |                    |                         | Placebo/Q4W group | 93  | 0.04 (0.02-0.11) |  |                  |  |
|    |                    |                         | Total             | 264 | 0.03 (0.02-0.07) |  |                  |  |
|    |                    |                         | Q8W/Q8W group     | 173 | 0.03 (0.01-0.07) |  |                  |  |
|    |                    |                         | Placebo/Q8W group | 93  | 0.04 (0.02-0.11) |  |                  |  |
|    |                    |                         | Total             | 266 | 0.04 (0.02-0.07) |  |                  |  |
|    |                    |                         | Hospitalization   |     |                  |  |                  |  |
| 7  | Corren et al. 2020 | Placebo                 |                   | 138 |                  |  |                  |  |
|    |                    | Low-dose Tezepelumab    |                   | 138 |                  |  | 0.27 (0.09-0.76) |  |
|    |                    | Medium-Dose Tezepelumab |                   | 137 |                  |  | 0.52 (0.19-1.41) |  |
|    |                    | High-dose Tezepelumab   |                   | 137 |                  |  | 0.42 (0.15-1.20) |  |
|    |                    | Overall tezepelumab     |                   | 412 |                  |  | 0.39 (0.18-0.85) |  |
| 14 | Busse et al. 2018  | ≥ 300 cells per uL      | Q4W/Q4W group     | 347 | 0.05 (0.03-0.07) |  |                  |  |
|    |                    |                         | Placebo/Q4W group | 172 | 0.04 (0.02-0.08) |  |                  |  |
|    |                    |                         | Total             | 519 | 0.04 (0.03-0.07) |  |                  |  |
|    |                    |                         | Q8W/Q8W group     | 339 | 0.03 (0.02-0.06) |  |                  |  |
|    |                    |                         | Placebo/Q8W group | 188 | 0.05 (0.03-0.10) |  |                  |  |
|    |                    |                         | Total             | 527 | 0.04 (0.03-0.06) |  |                  |  |
|    |                    | < 300 cells per uL      | Q4W/Q4W group     | 171 | 0.05 (0.03-0.10) |  |                  |  |

|  |  |  |                   |     |                  |  |  |  |
|--|--|--|-------------------|-----|------------------|--|--|--|
|  |  |  | Placebo/Q4W group | 93  | 0.09 (0.04-0.17) |  |  |  |
|  |  |  | Total             | 264 | 0.06 (0.04-0.10) |  |  |  |
|  |  |  | Q8W/Q8W group     | 173 | 0.05 (0.03-0.10) |  |  |  |
|  |  |  | Placebo/Q8W group | 93  | 0.05 (0.02-0.13) |  |  |  |
|  |  |  | Total             | 266 | 0.05 (0.03-0.09) |  |  |  |

**Table S11. Summary of Observational Studies**

| List | Trial                    | Treatment Arm                        | N    | Age at first assessment |         | Age at onset of symptoms |         | Gender         |         | BMI        |         |
|------|--------------------------|--------------------------------------|------|-------------------------|---------|--------------------------|---------|----------------|---------|------------|---------|
|      |                          |                                      |      | mean, (SD)              | p-value | mean, (SD)               | p-value | Female         | p-value | mean, (SD) | P-value |
| 13   | Jackson et al. 2021      | No biologic therapy                  | 687  | 49.1 (14.3)             | 0.332   | 23.6 (18.9)              | 0.321   | M:259<br>F:428 | 0.964   | 30.8 (7.4) | 0.747   |
|      |                          | Biologic therapy                     | 1524 | 49.7 (14.3)             |         | 24.5 (19.2)              |         | M:573<br>F:951 |         | 30.9 (6.9) |         |
|      |                          | Anti-IgE                             | 329  | 47.6 (14.6)             | <0.001  | 15.2 (16.0)              | <0.001  | M:109<br>F:220 | 0.053   | 31.3 (6.8) | 0.183   |
|      |                          | Anti-IL5                             | 1120 | 50.7 (14.1)             |         | 27.5 (19.2)              |         | M:437<br>F:683 |         | 30.7 (7.0) |         |
|      |                          | T2-low                               | 210  | 48.1 (15.1)             | 0.522   | 17.1 (16.6)              | <0.001  | M:69<br>F:141  | 0.076   | 32.1 (7.8) | <0.001  |
|      |                          | T2-high                              | 992  | 48.8 (14.3)             |         | 25.9 (19.1)              |         | M:391<br>F:601 |         | 30.2 (6.7) |         |
| 14   | Padilla-Galo et al. 2020 | Total                                | 42   | 53.6 (11)               |         |                          |         | M:9<br>F:33    |         | 28.6 (6)   |         |
|      |                          | Biologic treatment naïve patients    | 20   | 58 (20.75)              | 0.089   | 30 (24)                  | 0.079   | M:4<br>F:16    | 1       | 28 (6.75)  | 0.98    |
|      |                          | Patients with prior biologic therapy | 22   | 52 (14.75)              |         | 22.5 (14)                |         | M:5<br>F:17    |         | 27.5 (8.5) |         |
|      |                          | Non-atopic                           | 28   | 56 (20)                 | 0.153   | 26.5 (23)                | 0.913   | M:5<br>F:23    | 0.451   | 28.5 (7.5) | 0.131   |



|  |  |        |    |           |  |           |  |             |  |         |  |
|--|--|--------|----|-----------|--|-----------|--|-------------|--|---------|--|
|  |  | Atopic | 14 | 49.5 (15) |  | 24.5 (16) |  | M:4<br>F:10 |  | 25 (10) |  |
|--|--|--------|----|-----------|--|-----------|--|-------------|--|---------|--|

## Reference

1. Menzies-Gow, A., et al., *Tezepelumab in Adults and Adolescents with Severe, Uncontrolled Asthma*. N Engl J Med, 2021. **384**(19): p. 1800-1809.
2. Emson, C., et al., *CASCADE: a phase 2, randomized, double-blind, placebo-controlled, parallel-group trial to evaluate the effect of tezepelumab on airway inflammation in patients with uncontrolled asthma*. Respir Res, 2020. **21**(1): p. 265.
3. Busse, W.W., et al., *Long-term safety and efficacy of benralizumab in patients with severe, uncontrolled asthma: 1-year results from the BORA phase 3 extension trial*. Lancet Respir Med, 2019. **7**(1): p. 46-59.
4. Corren, J., et al., *Tezepelumab in Adults with Uncontrolled Asthma*. N Engl J Med, 2017. **377**(10): p. 936-946.
5. Nair, P., et al., *Oral Glucocorticoid-Sparing Effect of Benralizumab in Severe Asthma*. N Engl J Med, 2017. **376**(25): p. 2448-2458.
6. Bleecker, E.R., et al., *Efficacy and safety of benralizumab for patients with severe asthma uncontrolled with high-dosage inhaled corticosteroids and long-acting beta2-agonists (SIROCCO): a randomised, multicentre, placebo-controlled phase 3 trial*. Lancet, 2016. **388**(10056): p. 2115-2127.
7. FitzGerald, J.M., et al., *Benralizumab, an anti-interleukin-5 receptor alpha monoclonal antibody, as add-on treatment for patients with severe, uncontrolled, eosinophilic asthma (CALIMA): a randomised, double-blind, placebo-controlled phase 3 trial*. Lancet, 2016. **388**(10056): p. 2128-2141.
8. Park, H.S., et al., *A Phase 2a Study of Benralizumab for Patients with Eosinophilic Asthma in South Korea and Japan*. Int Arch Allergy Immunol, 2016. **169**(3): p. 135-45.
9. Castro, M., et al., *Benralizumab, an anti-interleukin 5 receptor alpha monoclonal antibody, versus placebo for uncontrolled eosinophilic asthma: a phase 2b randomised dose-ranging study*. Lancet Respir Med, 2014. **2**(11): p. 879-890.
10. Nowak, R.M., et al., *A randomized trial of benralizumab, an antiinterleukin 5 receptor alpha monoclonal antibody, after acute asthma*. Am J Emerg Med, 2015. **33**(1): p. 14-20.
11. Harrison, T.W., et al., *Onset of effect and impact on health-related quality of life, exacerbation rate, lung function, and nasal polyposis symptoms for patients with severe eosinophilic asthma treated with benralizumab (ANDHI): a randomised, controlled, phase 3b trial*. Lancet Respir Med, 2021. **9**(3): p. 260-274.
12. Laviolette, M., et al., *Effects of benralizumab on airway eosinophils in asthmatic patients with sputum eosinophilia*. J Allergy Clin Immunol, 2013. **132**(5): p. 1086-1096 e5.
13. Jackson, D.J., et al., *Characterisation of patients with severe asthma in the UK Severe Asthma Registry in the biologic era*. Thorax, 2021. **76**(3): p. 220-227.
14. Padilla-Galo, A., et al., *Real-life experience with benralizumab during 6 months*. BMC Pulm Med, 2020. **20**(1): p. 184.
15. Pelaia, C., et al., *Real-Life effects of benralizumab on exacerbation number and lung hyperinflation in atopic patients with severe eosinophilic asthma*. Biomed Pharmacother, 2020. **129**: p. 110444.
16. Menzella, F., et al., *Biologics and Bronchial Thermoplasty for severe refractory asthma treatment: From eligibility criteria to real practice. A cross-sectional study*. Pulm Pharmacol Ther, 2020. **60**: p. 101874.
17. Corren, J., et al., *Tezepelumab improves patient-reported outcomes in patients with severe, uncontrolled asthma in*

PATHWAY. *Ann Allergy Asthma Immunol*, 2021. **126**(2): p. 187-193.

18. Corren, J., et al., *The effect of tezepelumab on hospitalizations and emergency department visits in patients with severe asthma*. *Ann Allergy Asthma Immunol*, 2020. **125**(2): p. 211-214.
19. Lugogo, N.L., et al., *Blood eosinophil count group shifts and kinetics in severe eosinophilic asthma*. *Ann Allergy Asthma Immunol*, 2020. **125**(2): p. 171-176.
20. Jackson, D.J., et al., *Ability of Serum IgE Concentration to Predict Exacerbation Risk and Benralizumab Efficacy for Patients with Severe Eosinophilic Asthma*. *Adv Ther*, 2020. **37**(2): p. 718-729.
21. Chipps, B.E., et al., *Benralizumab efficacy for patients with fixed airflow obstruction and severe, uncontrolled eosinophilic asthma*. *Ann Allergy Asthma Immunol*, 2020. **124**(1): p. 79-86.
22. Chia, Y.L., et al., *Relationship Between Benralizumab Exposure and Efficacy for Patients With Severe Eosinophilic Asthma*. *Clin Pharmacol Ther*, 2019. **106**(2): p. 383-390.
23. Chupp, G., et al., *Rapid onset of effect of benralizumab on morning peak expiratory flow in severe, uncontrolled asthma*. *Ann Allergy Asthma Immunol*, 2019. **122**(5): p. 478-485.
24. Bleecker, E.R., et al., *Baseline patient factors impact on the clinical efficacy of benralizumab for severe asthma*. *Eur Respir J*, 2018. **52**(4).
25. DuBuske, L., et al., *Seasonal variability of exacerbations of severe, uncontrolled eosinophilic asthma and clinical benefits of benralizumab*. *Allergy Asthma Proc*, 2018. **39**(5): p. 345-349.
26. Chipps, B.E., et al., *Benralizumab efficacy by atopy status and serum immunoglobulin E for patients with severe, uncontrolled asthma*. *Ann Allergy Asthma Immunol*, 2018. **120**(5): p. 504-511 e4.
27. Sehmi, R., et al., *Benralizumab attenuates airway eosinophilia in prednisone-dependent asthma*. *J Allergy Clin Immunol*, 2018. **141**(4): p. 1529-1532 e8.
28. Ohta, K., et al., *Efficacy and safety of benralizumab in Japanese patients with severe, uncontrolled eosinophilic asthma*. *Allergol Int*, 2018. **67**(2): p. 266-272.
29. Goldman, M., et al., *The association between blood eosinophil count and benralizumab efficacy for patients with severe, uncontrolled asthma: subanalyses of the Phase III SIROCCO and CALIMA studies*. *Curr Med Res Opin*, 2017. **33**(9): p. 1605-1613.
30. Pham, T.H., et al., *Reductions in eosinophil biomarkers by benralizumab in patients with asthma*. *Respir Med*, 2016. **111**: p. 21-9.
